# Supplementary material for: Meso-β, β–β′ trifused porphyrins: synthesis, spectral, electrochemical and DFT studies and their femtosecond third-order nonlinear optical properties
Source: Royal Society of Chemistry journal article supplement (doi:10.1039/d4dt02930e), 2025-01-01
Supplement: d4dt02930e1.pdf [file d4dt02930e1.pdf]

Electronic Supplementary Information for

**Meso- $\beta$ ,  $\beta$ - $\beta'$  Trifused Porphyrins: Synthesis, Spectral, Electrochemical and DFT Studies and Their Femtosecond Third-Order Nonlinear Optical Properties**

Amir Sohel Bulbul,<sup>a</sup> Jhansi Mogilipuri,<sup>b</sup> Venugopal Rao Soma,<sup>\*c,d</sup> and Muniappan Sankar<sup>\*a</sup>

<sup>a</sup>Department of Chemistry, Indian Institute of Technology Roorkee, Roorkee, 247667, India

<sup>b</sup>Sri Sathya Sai University for Human Excellence, Navanihal, 585313, Karnataka

<sup>c</sup>DRDO Industry Academia – Centre of Excellence (DIA-CoE; formerly ACRHEM), University of Hyderabad, Hyderabad 500046, India

<sup>d</sup>School of Physics, University of Hyderabad, Hyderabad 500046, India

<sup>\*</sup>Authors for Correspondence: soma\_venu@uohyd.ac.in; m.sankar@cy.iitr.ac.in

| Table of Contents    |                                                                                                                                                                                         | Page No. |
|----------------------|-----------------------------------------------------------------------------------------------------------------------------------------------------------------------------------------|----------|
| Experimental Section |                                                                                                                                                                                         | S4-S8    |
| <b>Fig. S1</b>       | (a) Basic skeleton of ZnTFPMB(MN) <sub>2</sub> showing labelled carbon atoms, (b) displacement of porphyrin 24-core atoms from the mean plane of ZnTFPMB(MN) <sub>2</sub> in angstroms. | S9       |
| <b>Table S1</b>      | Crystallographic data of ZnTFPMB(MN) <sub>2</sub> .                                                                                                                                     | S9       |
| <b>Table S2</b>      | Selected average bond lengths and angles of ZnTFPMB(MN) <sub>2</sub> .                                                                                                                  | S10      |
| <b>Fig. S2</b>       | Comparative absorption spectra of compounds indicated in CH <sub>2</sub> Cl <sub>2</sub> at 298 K.                                                                                      | S11      |
| <b>Fig. S3</b>       | Comparative absorption spectra of compounds indicated in CH <sub>2</sub> Cl <sub>2</sub> at 298 K.                                                                                      | S11      |
| <b>Fig. S4</b>       | Comparative absorption spectra of compounds indicated in CH <sub>2</sub> Cl <sub>2</sub> at 298 K.                                                                                      | S12      |
| <b>Fig. S5</b>       | Comparative emission spectra of compounds indicated in CH <sub>2</sub> Cl <sub>2</sub> at 298 K.                                                                                        | S12      |
| <b>Fig. S6</b>       | Comparative emission spectra of compounds indicated in CH <sub>2</sub> Cl <sub>2</sub> at 298 K.                                                                                        | S13      |
| <b>Fig. S7</b>       | Comparative emission spectra of compounds indicated in CH <sub>2</sub> Cl <sub>2</sub> at 298 K.                                                                                        | S13      |
| <b>Fig. S8</b>       | Comparative fluorescence lifetime decay profile of H <sub>2</sub> TPCMB(IND) <sub>2</sub> and H <sub>2</sub> TPCMB(MN) <sub>2</sub> .                                                   | S14      |

|                 |                                                                                                                                                                                 |     |
|-----------------|---------------------------------------------------------------------------------------------------------------------------------------------------------------------------------|-----|
| <b>Fig. S9</b>  | Fluorescence lifetime decay profile of H <sub>2</sub> TFPMB(IND) <sub>2</sub> .                                                                                                 | S14 |
| <b>Fig. S10</b> | Fluorescence lifetime decay profile of ZnTFPMB(IND) <sub>2</sub> .                                                                                                              | S15 |
| <b>Fig. S11</b> | <sup>1</sup> H NMR spectrum of H <sub>2</sub> TPCMB(IND) <sub>2</sub> in CDCl <sub>3</sub> at 298 K.                                                                            | S15 |
| <b>Fig. S12</b> | <sup>1</sup> H NMR spectrum of H <sub>2</sub> TFPMB(IND) <sub>2</sub> in CDCl <sub>3</sub> at 298 K.                                                                            | S16 |
| <b>Fig. S13</b> | <sup>1</sup> H NMR spectrum of ZnTFPMB(IND) <sub>2</sub> in CDCl <sub>3</sub> at 298 K.                                                                                         | S16 |
| <b>Fig. S14</b> | <sup>1</sup> H NMR spectrum of ZnTFPMB(MN) <sub>2</sub> in CDCl <sub>3</sub> at 298 K.                                                                                          | S17 |
| <b>Fig. S15</b> | <sup>1</sup> H NMR spectrum of ZnTFPMB(VCN) <sub>2</sub> in CD <sub>3</sub> OD+CDCl <sub>3</sub> at 298 K.                                                                      | S17 |
| <b>Fig. S16</b> | <sup>13</sup> C NMR spectrum of ZnTFPMB(VCN) <sub>2</sub> in CD <sub>3</sub> OD+CDCl <sub>3</sub> at 298 K.                                                                     | S18 |
| <b>Fig. S17</b> | MALDI-TOF mass spectrum of H <sub>2</sub> TPCMB(IND) <sub>2</sub> in positive ion mode at 298 K.                                                                                | S18 |
| <b>Fig. S18</b> | MALDI-TOF mass spectrum of H <sub>2</sub> TFPMB(IND) <sub>2</sub> in positive ion mode at 298 K.                                                                                | S19 |
| <b>Fig. S19</b> | MALDI-TOF mass spectrum of CuTFPMB(IND) <sub>2</sub> in positive ion mode at 298 K.                                                                                             | S19 |
| <b>Fig. S20</b> | MALDI-TOF mass spectrum of ZnTFPMB(IND) <sub>2</sub> in positive ion mode at 298 K.                                                                                             | S20 |
| <b>Fig. S21</b> | MALDI-TOF mass spectrum of CuTFPMB(MN) <sub>2</sub> in positive ion mode at 298 K.                                                                                              | S20 |
| <b>Fig. S22</b> | MALDI-TOF mass spectrum of ZnTFPMB(MN) <sub>2</sub> in positive ion mode at 298 K.                                                                                              | S21 |
| <b>Fig. S23</b> | MALDI-TOF mass spectrum of CuTFPMB(VCN) <sub>2</sub> in positive ion mode at 298 K.                                                                                             | S21 |
| <b>Fig. S24</b> | MALDI-TOF mass spectrum of ZnTFPMB(VCN) <sub>2</sub> in positive ion mode at 298 K.                                                                                             | S22 |
| <b>Fig. S25</b> | Cyclic voltammograms of IND-appended porphyrinoids in CH <sub>2</sub> Cl <sub>2</sub> at 298 K using TBAPF <sub>6</sub> as a supporting electrolyte. Scan rate = 100 mV/s.      | S22 |
| <b>Fig. S26</b> | Cyclic voltammograms of MN-appended porphyrinoids in CH <sub>2</sub> Cl <sub>2</sub> at 298 K using TBAPF <sub>6</sub> as a supporting electrolyte. Scan rate = 100 mV/s.       | S23 |
| <b>Fig. S27</b> | Complete FMO profile of compounds indicated.                                                                                                                                    | S23 |
| <b>Fig. S28</b> | Complete FMO profile of compounds indicated.                                                                                                                                    | S24 |
| <b>Fig. S29</b> | Complete FMO profile of compounds indicated.                                                                                                                                    | S24 |
| <b>Fig. S30</b> | Optimized geometry (top view a, b, c) and (side view d, e, f) of H <sub>2</sub> TFPMB(IND) <sub>2</sub> , CuTFPMB(IND) <sub>2</sub> and ZnTFPMB(IND) <sub>2</sub> respectively. | S25 |

|                 |                                                                                                                                                                                                                                                                   |     |
|-----------------|-------------------------------------------------------------------------------------------------------------------------------------------------------------------------------------------------------------------------------------------------------------------|-----|
|                 | The unfused <i>meso</i> -phenyl groups are omitted for clarity in the side views.                                                                                                                                                                                 |     |
| <b>Fig. S31</b> | Optimized geometry (top view a, b, c) and (side view d, e, f) of H <sub>2</sub> TFPMB(MN) <sub>2</sub> , CuTFPMB(MN) <sub>2</sub> and ZnTFPMB(MN) <sub>2</sub> respectively. The unfused <i>meso</i> -phenyl groups are omitted for clarity in the side views.    | S25 |
| <b>Fig. S32</b> | Optimized geometry (top view a, b, c) and (side view d, e, f) of H <sub>2</sub> TFPMB(VCN) <sub>2</sub> , CuTFPMB(VCN) <sub>2</sub> and ZnTFPMB(VCN) <sub>2</sub> respectively. The unfused <i>meso</i> -phenyl groups are omitted for clarity in the side views. | S26 |
| <b>Table S3</b> | Selected average bond lengths and angles of synthesized IND-appended porphyrinoids.                                                                                                                                                                               | S27 |
| <b>Table S4</b> | Selected average bond lengths and angles of synthesized MN-appended porphyrinoids.                                                                                                                                                                                | S28 |
| <b>Table S5</b> | Selected average bond lengths and angles of synthesized $\pi$ -extended trifused porphyrins.                                                                                                                                                                      | S29 |
| <b>Table S6</b> | Theoretically calculated ground state dipole moment and HOMO-LUMO energy gap of synthesized porphyrinoids.                                                                                                                                                        | S30 |
| <b>Fig. S33</b> | Comparative (theoretical and experimental) absorption spectra of H <sub>2</sub> TPCMB(IND) <sub>2</sub> .                                                                                                                                                         | S30 |
| <b>Fig. S34</b> | Comparative (theoretical and experimental) absorption spectra of H <sub>2</sub> TFPMB(IND) <sub>2</sub> .                                                                                                                                                         | S31 |
| <b>Fig. S35</b> | Comparative (theoretical and experimental) absorption spectra of CuTFPMB(IND) <sub>2</sub> .                                                                                                                                                                      | S31 |
| <b>Fig. S36</b> | Comparative (theoretical and experimental) absorption spectra of ZnTFPMB(IND) <sub>2</sub> .                                                                                                                                                                      | S32 |
| <b>Fig. S37</b> | Comparative (theoretical and experimental) absorption spectra of H <sub>2</sub> TPCMB(MN) <sub>2</sub> .                                                                                                                                                          | S32 |
| <b>Fig. S38</b> | Comparative (theoretical and experimental) absorption spectra of H <sub>2</sub> TFPMB(MN) <sub>2</sub> .                                                                                                                                                          | S33 |
| <b>Fig. S39</b> | Comparative (theoretical and experimental) absorption spectra of CuTFPMB(MN) <sub>2</sub> .                                                                                                                                                                       | S33 |
| <b>Fig. S40</b> | Comparative (theoretical and experimental) absorption spectra of ZnTFPMB(MN) <sub>2</sub> .                                                                                                                                                                       | S34 |
| <b>Fig. S41</b> | Comparative (theoretical and experimental) absorption spectra of H <sub>2</sub> TFPMB(VCN) <sub>2</sub> .                                                                                                                                                         | S34 |

|                 |                                                                                                                                                                             |     |
|-----------------|-----------------------------------------------------------------------------------------------------------------------------------------------------------------------------|-----|
| <b>Fig. S42</b> | Comparative (theoretical and experimental) absorption spectra of CuTFPMB(VCN) <sub>2</sub> .                                                                                | S35 |
| <b>Fig. S43</b> | Comparative (theoretical and experimental) absorption spectra of ZnTFPMB(VCN) <sub>2</sub> .                                                                                | S35 |
| <b>Table S6</b> | Calculated electronic excitation energies, major orbital contribution, theoretical and experimental absorption maxima, and oscillatory strength of investigated porphyrins. | S36 |
|                 | References                                                                                                                                                                  | S37 |

## EXPERIMENTAL SECTION

### Chemicals and Instruments

Benzaldehyde and Pyrrole were purchased from SRL India and TCI Chemicals, respectively. Metal salts, K<sub>2</sub>CO<sub>3</sub>, N-bromosuccinimide (NBS) and DDQ were purchased from SRL, India. Malononitrile, Indane-1,3-dione, Methylacrylate and TBACN were taken from Sigma Aldrich and used as received. TBAPF<sub>6</sub> is purchased from Sigma Aldrich. The chloroform, dichloromethane, hexane and toluene solvents were distilled or dried before use. HPLC-grade solvent methanol, DMF and DMSO were purchased from Merck and used without further purification. Silica gel (100-200 mesh) was purchased from Finar Chemicals, India. TBAPF<sub>6</sub> was recrystallized three times from hot ethanol and dried under a vacuum. NBS was recrystallized from hot water and dried for 12 h at 70 °C under vacuum. Pd(OAc)<sub>2</sub> was purchased from Loba Chemie and used as received. Precoated thin layered silica gel chromatographic plates were purchased from E. Merck.

The electronic absorption spectra were recorded using a UV-1800 Shimadzu UV-Vis Spectrophotometer with a pair of 1 cm path-length quartz cells. The emission spectra were recorded on a HORIBA Fluoromax spectrofluorometer using a quartz cell of 10 mm path length. Fluorescence lifetime data was collected on the Edinburg FLS-1000-xs-t instrument with picosecond pulsed diode laser sources of wavelength 450 nm. <sup>1</sup>H NMR spectra were recorded using a JEOL ECX 500 MHz spectrometer using CDCl<sub>3</sub> and CD<sub>2</sub>Cl<sub>2</sub> as a solvent. Bruker Ultraflexextreme-TN MALDI-TOF mass spectrometer was used to record mass spectra. The single crystal X-ray diffraction data were collected on a Bruker Apex-II CCD diffractometer. The cyclic voltammetry (CV) studies were carried out using CH instruments

(CHI 7044E). A three-electrode assembly that consisted of a platinum working electrode, Ag/AgCl as a reference electrode, and Pt wire as a counter electrode was used. The porphyrin concentration was maintained at ~1 mM during electrochemical measurements. The whole experiment was performed under an inert atmosphere.

A femtosecond pulsed laser carried out the NLO experiments [M/s Coherent, Libra] with a pulse width of ~50 fs, a repetition rate of 1 kHz, and a wavelength of 800 nm. A lock-in amplifier and a photodiode were used to gather the signals using the LabVIEW program. We employed the 1D translational stage to scan the sample within the Rayleigh range to collect NLO absorption and refraction data, and more information is available in our earlier reports.<sup>1,2</sup>

### **Synthesis of *trans*-Mono Benzochlorin; H<sub>2</sub>TPCMB(IND)<sub>2</sub>**

1,3-Indanedione (106 mg, 0.725 mmol) and K<sub>2</sub>CO<sub>3</sub> (100 mg, 0.724 mmol) were dissolved in 3 ml of DMSO and purged with argon for 10 min. To this, 60 mg H<sub>2</sub>TPP(NO<sub>2</sub>)MB (0.072 mmol) was added and the resulting solution was stirred at 80 °C for 3 hours. The reaction was monitored by TLC and UV-Vis spectroscopy. After the completion of the reaction, the solution was allowed to cool to room temperature, and 15 ml CHCl<sub>3</sub> was added. The resulting mixture was washed three times with brine solution and the organic layer was separated and passed over anhydrous sodium sulphate. The solvent was removed under reduced pressure, and the crude product was purified using silica gel column chromatography using CHCl<sub>3</sub> as an eluent. The desired compound was recrystallized using CHCl<sub>3</sub>/MeOH (3:1) mixture.

**H<sub>2</sub>TPCMB(IND)<sub>2</sub>**: Yield: 74% (57 mg, 0.053 mmol), UV/vis (CH<sub>2</sub>Cl<sub>2</sub>): λ<sub>max</sub> (nm) (ε × 10<sup>-3</sup> M<sup>-1</sup> cm<sup>-1</sup>): 414(sh) (83), 436 (344), 519 (22), 564 (4), 616 (8), 674 (40). <sup>1</sup>H NMR (500 MHz, CDCl<sub>3</sub>) δ(ppm): 8.60 – 8.59 (m, 2H, β-H), 8.25 (d, *J* = 7.2 Hz, 2H, β-H), 8.22 (d, *J* = 4.7 Hz, 2H, *meso*-Ph-H), 8.03 (d, *J* = 7.7 Hz, 2H, *meso*-Ph-H), 7.97 (d, *J* = 7.4 Hz, 2H, *meso*-Ph-H), 7.94 – 7.82 (m, 8H, *meso*-Ph-H), 7.77 (t, *J* = 7.4 Hz, 2H, *meso*-Ph-H), 7.72 – 7.68 (m, 4H, *meso*-Ph-H), 7.56 (d, *J* = 7.5 Hz, 2H, IND-Ph-H), 7.50 (t, *J* = 7.5 Hz, 2H, IND-Ph-H), 7.45 (t, *J* = 7.4 Hz, 2H, IND-Ph-H), 7.30 – 7.28 (d, *J* = 7.5 Hz, 4H, IND-Ph-H & Benzo-CH), 4.88 (d, *J* = 2.8 Hz, 2H, β-CH of Chlorin), 3.89 (s, 6H, -COOCH<sub>3</sub>), 3.26 (d, *J* = 2.9 Hz, 2H, -CH of Chlorin), -1.78 (s, 2H, inner NH). MALDI-TOF-MS. Found: *m/z* 1071.807 ([M+H]<sup>+</sup>) Calcd: *m/z* 1071.332. Elemental analysis calcd. for C<sub>70</sub>H<sub>46</sub>N<sub>4</sub>O<sub>8</sub>: C, 78.49; H, 4.33; N, 5.23%. Found: C, 77.54; H, 3.83; N, 4.47%.

### **Synthesis of Trifused Mono Benzoporphyrin; H<sub>2</sub>TFPMB(IND)<sub>2</sub> and Its Metal Complexes; MTFPMB(IND)<sub>2</sub> where M = Cu(II) and Zn(II)**

40 mg H<sub>2</sub>TPCMB(IND)<sub>2</sub> was dissolved in 10 mL of CHCl<sub>3</sub>. To this, 10 equiv. DDQ was added and the resulting reaction mixture was refluxed for 10 hours. The progress of the reaction was monitored by UV-Vis and TLC. After completion of the reaction, the mixture was washed three times with water to remove excess DDQ. The organic layer was passed over anhydrous sodium sulfate and the solvent was evaporated under reduced pressure. The crude product was purified by silica gel column chromatography using CHCl<sub>3</sub> as an eluent.

**H<sub>2</sub>TFPMB(IND)<sub>2</sub>:** Yield: 85% (34 mg, 0.032 mmol), UV/vis (CH<sub>2</sub>Cl<sub>2</sub>): λ<sub>max</sub> (nm) (ε × 10<sup>-3</sup> M<sup>-1</sup> cm<sup>-1</sup>): 478 (406), 572 (22), 619 (21), 650 (10), 714 (9). <sup>1</sup>H NMR (500 MHz, CDCl<sub>3</sub>) δ(ppm): 9.52 (d, *J* = 4.6 Hz, 2H, β-H), 8.72 (d, *J* = 4.8 Hz, 2H, β-H), 8.17 (d, *J* = 7.7 Hz, 2H, Fused-*meso*-Ph-H), 8.10 (d, *J* = 6.8 Hz, 4H, Fused-*meso*-Ph-H), 8.05 – 7.97 (m, 4H, *meso*-Ph-H), 7.97 – 7.86 (m, 6H, *meso*-Ph-H), 7.83 (t, *J* = 7.5 Hz, 4H, *meso*-Ph-H & IND-Ph-H), 7.49 (t, *J* = 7.8 Hz, 2H, IND-Ph-H), 7.30 (s, 2H, Benzo-CH), 7.04 (d, *J* = 7.7 Hz, 2H, IND-Ph-H), 6.91 (d, *J* = 7.8 Hz, 2H, IND-Ph-H), 3.90 (s, 6H, -COOCH<sub>3</sub>), -0.27 (s, 2H, inner NH). MALDI-TOF-MS. Found: *m/z* 1065.647 ([M+H]<sup>+</sup>) Calcd: *m/z* 1065.285. Elemental analysis calcd. for C<sub>70</sub>H<sub>40</sub>N<sub>4</sub>O<sub>8</sub>: C, 78.94; H, 3.79; N, 5.26%. Found: C, 77.82; H, 3.12; N, 4.52%.

10 mg of H<sub>2</sub>TFPMB(IND)<sub>2</sub> was dissolved in 5 mL of CHCl<sub>3</sub> in two different round bottom flasks. To this, 10 equiv. of M(OAc)<sub>2</sub>.xH<sub>2</sub>O (M = Cu(II) and Zn(II)) in 1 mL of MeOH was added and the resulting solution was refluxed for 1 hour. After completion of the reaction, the solvent was removed under reduced pressure and the crude products were redissolved in CHCl<sub>3</sub> and washed twice with water to remove excess metal salts. The organic layer was separated and dried over anhydrous sodium sulfate. The desired metal complexes were purified by silica gel column chromatography using acetone/CHCl<sub>3</sub> (1:99) as an eluent and recrystallized using CHCl<sub>3</sub>/MeOH (3:1) mixture.

**CuTFPMB(IND)<sub>2</sub>:** Yield: 85% (9 mg, 0.008 mmol), UV/vis (CH<sub>2</sub>Cl<sub>2</sub>): λ<sub>max</sub> (nm) (ε × 10<sup>-3</sup> M<sup>-1</sup> cm<sup>-1</sup>): 480 (363), 606 (32), 651 (15). MALDI-TOF-MS. Found: *m/z* 1126.677 ([M+H]<sup>+</sup>) Calcd: *m/z* 1126.199. Elemental analysis calcd. for C<sub>70</sub>H<sub>38</sub>N<sub>4</sub>O<sub>8</sub>Cu: C, 74.63; H, 3.40; N, 4.97%. Found: C, 73.73; H, 2.90; N, 4.12%.

**ZnTFPMB(IND)<sub>2</sub>:** Yield: 76% (8 mg, 0.007 mmol), UV/vis (CH<sub>2</sub>Cl<sub>2</sub>): λ<sub>max</sub> (nm) (ε × 10<sup>-3</sup> M<sup>-1</sup> cm<sup>-1</sup>): 459(sh) (39), 485 (189), 537 (9), 614 (10), 661 (4). <sup>1</sup>H NMR (400 MHz, CDCl<sub>3</sub>) δ(ppm): 9.55 (d, *J* = 4.7 Hz, 2H, β-H), 8.75 (d, *J* = 4.6 Hz, 2H, β-H), 8.23 (d, *J* = 7.9 Hz, 2H, Fused-*meso*-Ph-H), 8.13 (s, 4H, Fused-*meso*-Ph-H), 8.03 (dt, *J* = 7.3, 3.7 Hz, 4H, Fused-*meso*-Ph-H & IND-Ph-H), 7.95 – 7.81 (m, 10H, Unfused-*meso*-Ph-H), 7.54 – 7.49 (m, 4H, Benzo-CH &

IND-Ph-H), 7.07 – 7.02 (m, 2H, IND-Ph-H), 6.96 – 6.91 (m, 2H, IND-Ph-H), 3.92 (s, 6H, -COOCH<sub>3</sub>). MALDI-TOF-MS. Found: m/z 1127.527 ([M+H]<sup>+</sup>) Calcd: m/z 1127.198. Elemental analysis calcd. for C<sub>70</sub>H<sub>38</sub>N<sub>4</sub>O<sub>8</sub>Zn: C, 74.51; H, 3.39; N, 4.96%. Found: C, 73.32; H, 2.95; N, 4.02%.

Synthesis and characterization data of H<sub>2</sub>TPCMB(MN)<sub>2</sub>, H<sub>2</sub>TFPMB(MN)<sub>2</sub> and H<sub>2</sub>TFPMB(VCN)<sub>2</sub> will be found in recently reported literature by our group.<sup>3</sup>

### Synthesis of MTFPMB(MN)<sub>2</sub> where M = Cu(II) and Zn(II)

10 mg of H<sub>2</sub>TFPMB(MN)<sub>2</sub> was dissolved in 5 mL of CHCl<sub>3</sub> in two different round bottom flasks. To this, 10 equiv. of M(OAc)<sub>2</sub>.xH<sub>2</sub>O (M = Cu(II) and Zn(II)) in 1 mL of MeOH was added and the resulting solution was refluxed for 1 hour. After completion of the reaction, the solvent was removed under reduced pressure and the crude products were redissolved in CHCl<sub>3</sub> and washed twice with water to remove excess metal salts. The organic layer was separated and dried over anhydrous sodium sulfate. The desired metal complexes were purified by silica gel column chromatography using acetone/CHCl<sub>3</sub> (1:99) as an eluent and recrystallized using CHCl<sub>3</sub>/MeOH (3:1) mixture.

**CuTFPMB(MN)<sub>2</sub>:** Yield: 85% (9 mg, 0.009 mmol), UV/vis (CH<sub>2</sub>Cl<sub>2</sub>): λ<sub>max</sub> (nm) (ε × 10<sup>-3</sup> M<sup>-1</sup> cm<sup>-1</sup>): 481 (256), 612 (20), 659 (22). MALDI-TOF-MS. Found: m/z 965.752 ([M]<sup>+</sup>) Calcd: m/z 965.169. Elemental analysis calcd. for C<sub>58</sub>H<sub>30</sub>N<sub>8</sub>O<sub>4</sub>Cu: C, 72.08; H, 3.13; N, 11.59%. Found: C, 71.16; H, 2.70; N, 10.82%.

**ZnTFPMB(MN)<sub>2</sub>:** Yield: 84% (9 mg, 0.009 mmol), UV/vis (CH<sub>2</sub>Cl<sub>2</sub>): λ<sub>max</sub> (nm) (ε × 10<sup>-3</sup> M<sup>-1</sup> cm<sup>-1</sup>): 462(sh) (88), 488 (359), 623 (18), 674 (21). <sup>1</sup>H NMR (500 MHz, CDCl<sub>3</sub>) δ (ppm): 9.47 (d, *J* = 4.7 Hz, 2H, β-H), 8.70 (d, *J* = 4.7 Hz, 2H, β-H), 8.47 (d, *J* = 7.7 Hz, 2H, Fused-*o*-Ph-H), 8.33 (d, *J* = 8.1 Hz, 2H, Fused-*p*-Ph-H), 8.02 (d, *J* = 6.6 Hz, 4H, Fused-*m*-Ph-H), 7.91 (t, *J* = 7.6 Hz, 2H, Unfused-*meso*-Ph-H), 7.84 (dt, *J* = 14.9, 7.6 Hz, 6H, Unfused-*meso*-Ph-H), 7.69 (t, *J* = 7.4 Hz, 2H, Unfused-*meso*-Ph-H), 7.36 (s, 2H, Benzo-CH), 3.84 (s, 6H, -COOCH<sub>3</sub>). MALDI-TOF-MS. Found: m/z 967.732 ([M+H]<sup>+</sup>) Calcd: m/z 967.168. Elemental analysis calcd. for C<sub>58</sub>H<sub>30</sub>N<sub>8</sub>O<sub>4</sub>Zn: C, 71.94; H, 3.12; N, 11.57%. Found: C, 70.83; H, 2.76; N, 10.73%.

### Synthesis of π-Extended Trifused Porphyrins; MTFPMB(VCN)<sub>2</sub> where M = Cu(II) and Zn(II)

10 mg of H<sub>2</sub>TFPMB(VCN)<sub>2</sub> was dissolved in 5 mL of CHCl<sub>3</sub> in two different round bottom flasks. To this, 10 equiv. of M(OAc)<sub>2</sub>.xH<sub>2</sub>O (M = Cu(II) and Zn(II)) in 1 mL of MeOH was

added and the resulting solution was refluxed for 1 hour. After completion of the reaction, the solvent was removed under reduced pressure and the crude products were redissolved in  $\text{CHCl}_3$  and washed twice with water to remove excess metal salts. The organic layer was separated and dried over anhydrous  $\text{Na}_2\text{SO}_4$ . The desired metal complexes were purified by silica gel column chromatography using  $\text{CHCl}_3$  as eluent and recrystallized using  $\text{CHCl}_3/\text{MeOH}$  (3:1) mixture.

**CuTFPMB(VCN)<sub>2</sub>**: Yield: 84% (9 mg, 0.010 mmol), UV/vis ( $\text{CH}_2\text{Cl}_2$ ):  $\lambda_{\text{max}}$  (nm) ( $\epsilon \times 10^{-3} \text{ M}^{-1} \text{ cm}^{-1}$ ): 334 (39), 441 (77), 517 (50), 730 (180), 786 (15), 854 (22). MALDI-TOF-MS. Found:  $m/z$  913.454 ( $[\text{M}]^+$ ) Calcd:  $m/z$  913.162. Elemental analysis calcd. for  $\text{C}_{56}\text{H}_{30}\text{N}_6\text{O}_4\text{Cu}$ : C, 73.55; H, 3.31; N, 9.19%. Found: C, 72.82; H, 2.92; N, 8.75%.

**ZnTFPMB(VCN)<sub>2</sub>**: Yield: 75% (8 mg, 0.009 mmol), UV/vis ( $\text{CH}_2\text{Cl}_2$ ):  $\lambda_{\text{max}}$  (nm) ( $\epsilon \times 10^{-3} \text{ M}^{-1} \text{ cm}^{-1}$ ): 340 (30), 444 (66), 525 (44), 748 (14), 805 (16), 844 (19).  $^1\text{H}$  NMR (500 MHz,  $\text{CD}_3\text{OD}+\text{CDCl}_3$ )  $\delta$ (ppm): 9.02 (d,  $J = 8.3$  Hz, 2H, Fused-*meso*-Ph-H), 8.96 (d,  $J = 8.2$  Hz, 2H, Fused-*meso*-Ph-H), 8.69 (d,  $J = 4.5$  Hz, 2H,  $\beta$ -H), 8.05 (d,  $J = 4.5$  Hz, 2H,  $\beta$ -H), 7.98 (t,  $J = 7.4$  Hz, 2H, Fused-*meso*-Ph-H), 7.90 (d,  $J = 7.2$  Hz, 6H, Unfused-*meso*-Ph-H), 7.84 (t,  $J = 7.4$  Hz, 2H, Fused-*meso*-Ph-H), 7.76 (t,  $J = 7.4$  Hz, 4H, Unfused-*meso*-Ph-H), 6.98 (s, 2H, Benzo-CH), 3.85 (s, 6H,  $-\text{COOCH}_3$ ).  $^{13}\text{C}$  NMR (126 MHz,  $\text{CD}_3\text{OD}+\text{CDCl}_3$ )  $\delta$ (ppm): 169.06, 155.85, 139, 133.48, 133.39, 132.30, 131.41, 129.69, 129.04, 128.39, 127.88, 125.59, 125.51, 118.01, 110.58, 52.59. MALDI-TOF-MS. Found:  $m/z$  914.505 ( $[\text{M}]^+$ ) Calcd:  $m/z$  914.162. Elemental analysis calcd. for  $\text{C}_{56}\text{H}_{30}\text{N}_6\text{O}_4\text{Zn}$ : C, 73.41; H, 3.30; N, 9.17%. Found: C, 72.10; H, 2.72; N, 8.59%.



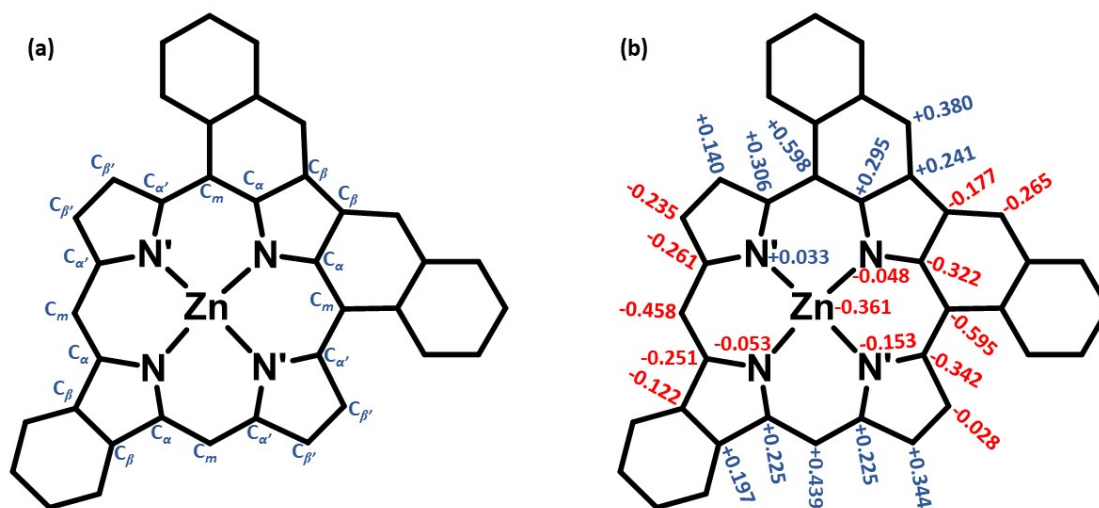

**Fig. S1** (a) Basic skeleton of ZnTFPMB(MN)<sub>2</sub> showing labeled carbon atoms, (b) displacement of porphyrin 24-core atoms from the mean plane of ZnTFPMB(MN)<sub>2</sub> in angstroms.

**Table S1** Crystallographic Data of ZnTFPMB(MN)<sub>2</sub>.

|                                         | <b>ZnTFPMB(MN)<sub>2</sub></b>                                                   |
|-----------------------------------------|----------------------------------------------------------------------------------|
| Empirical Formula                       | C <sub>61</sub> H <sub>38</sub> Cl <sub>3</sub> N <sub>8</sub> O <sub>6</sub> Zn |
| Formula Wt.                             | 1150.71 g/mol                                                                    |
| Crystal System                          | <i>Triclinic</i>                                                                 |
| Space Group                             | <i>P</i> $\bar{1}$                                                               |
| a (Å)                                   | 9.431(3)                                                                         |
| b (Å)                                   | 16.704(6)                                                                        |
| c (Å)                                   | 19.162(7)                                                                        |
| $\alpha$ (°)                            | 64.511(15)                                                                       |
| $\beta$ (°)                             | 81.957(16)                                                                       |
| $\gamma$ (°)                            | 85.757(16)                                                                       |
| Volume (Å <sup>3</sup> )                | 2697.8(16)                                                                       |
| Z                                       | 2                                                                                |
| D <sub>calcd</sub> (g/cm <sup>3</sup> ) | 1.417                                                                            |
| Wavelength (Å)                          | 0.71073                                                                          |
| T (K)                                   | 296(2)                                                                           |
| No. of total reflns.                    | 34685                                                                            |
| No. of Indepnt. reflns.                 | 9264                                                                             |
| R                                       | 0.0818                                                                           |
| GOOF                                    | 0.997                                                                            |
| CCDC                                    | 2392230                                                                          |

**Table S2** Selected average bond lengths and angles of ZnTFPMB(MN)<sub>2</sub>.

| <b>Bond Length (Å)</b>                            |                 |
|---------------------------------------------------|-----------------|
| M-N                                               | 1.380(5)        |
| M-N'                                              | 2.038(3)        |
| N-C <sub>α</sub>                                  | 1.375(5)        |
| N'-C <sub>α'</sub>                                | 1.380(5)        |
| <b>C<sub>α</sub>-C<sub>β</sub></b>                | <b>1.451(6)</b> |
| <b>C<sub>α'</sub>-C<sub>β'</sub></b>              | <b>1.441(6)</b> |
| C <sub>β</sub> -C <sub>β</sub>                    | 1.386(6)        |
| C <sub>β'</sub> -C <sub>β'</sub>                  | 1.346(6)        |
| C <sub>α</sub> -C <sub>m</sub>                    | 1.415(6)        |
| C <sub>α'</sub> -C <sub>m</sub>                   | 1.416(5)        |
| <b>ΔC<sub>β</sub> (Å)</b>                         | <b>0.728</b>    |
| <b>Δ24 (Å)</b>                                    | <b>0.560</b>    |
| <b>Δ38 (Å)</b>                                    | <b>0.562</b>    |
| ΔM                                                | 0.367           |
| <b>Bond Angles (°)</b>                            |                 |
| M-N-C <sub>α</sub>                                | 126.37(2)       |
| M-N'-C <sub>α'</sub>                              | 125.82(3)       |
| N-M-N                                             | 162.66(14)      |
| N'-M-N'                                           | 162.82(14)      |
| N-C <sub>α</sub> -C <sub>m</sub>                  | 124.37(3)       |
| N'-C <sub>α'</sub> -C <sub>m</sub>                | 125.27(4)       |
| N-C <sub>α</sub> -C <sub>β</sub>                  | 110.17(3)       |
| N'-C <sub>α'</sub> -C <sub>β'</sub>               | 108.45(4)       |
| C <sub>β</sub> -C <sub>α</sub> -C <sub>m</sub>    | 125.35(4)       |
| C <sub>β'</sub> -C <sub>α'</sub> -C <sub>m</sub>  | 126.02(4)       |
| C <sub>α</sub> -C <sub>m</sub> -C <sub>α'</sub>   | 124.37(4)       |
| C <sub>α</sub> -C <sub>β</sub> -C <sub>β</sub>    | 106.42(4)       |
| C <sub>α'</sub> -C <sub>β'</sub> -C <sub>β'</sub> | 107.75(4)       |
| C <sub>α</sub> -N-C <sub>α</sub>                  | 106.80(3)       |
| C <sub>α'</sub> -N-C <sub>α'</sub>                | 107.45(2)       |

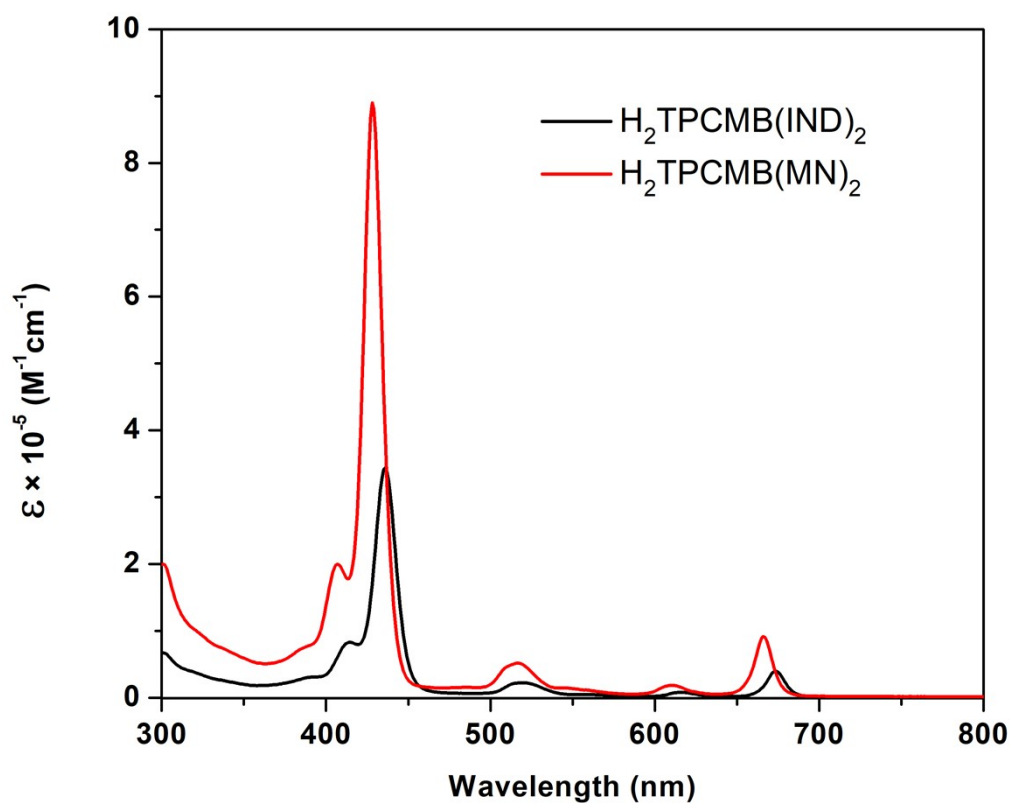

Fig. S2 Comparative absorption spectra of compounds indicated in  $\text{CH}_2\text{Cl}_2$  at 298 K.

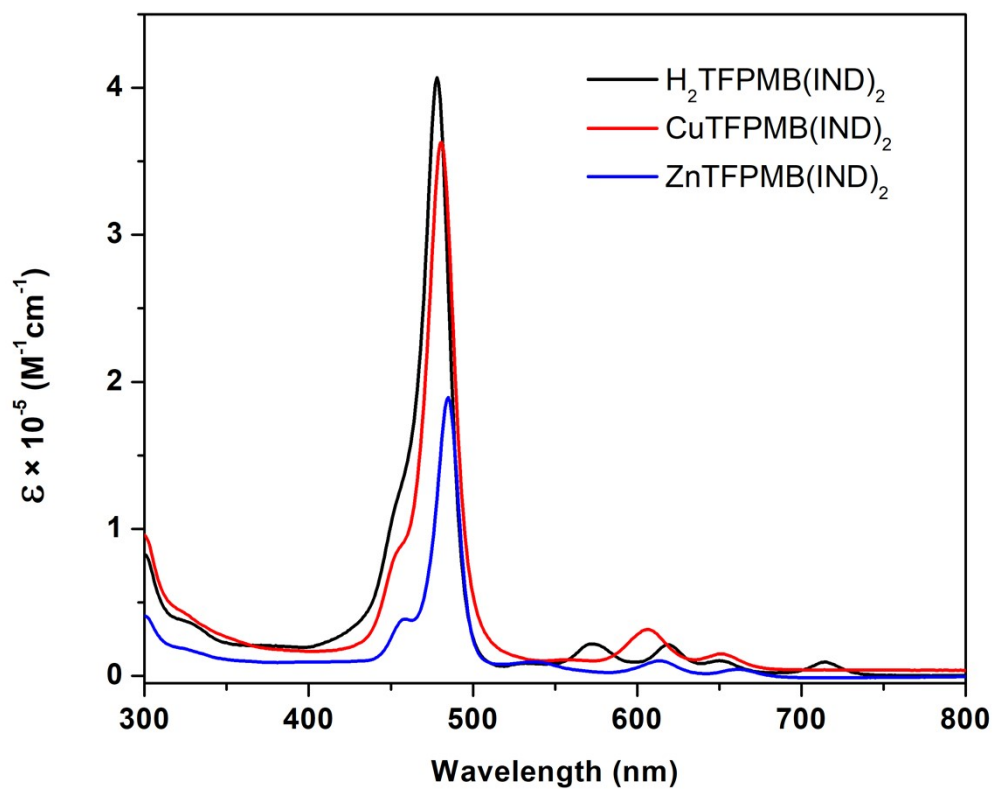

Fig. S3 Comparative absorption spectra of compounds indicated in  $\text{CH}_2\text{Cl}_2$  at 298 K.

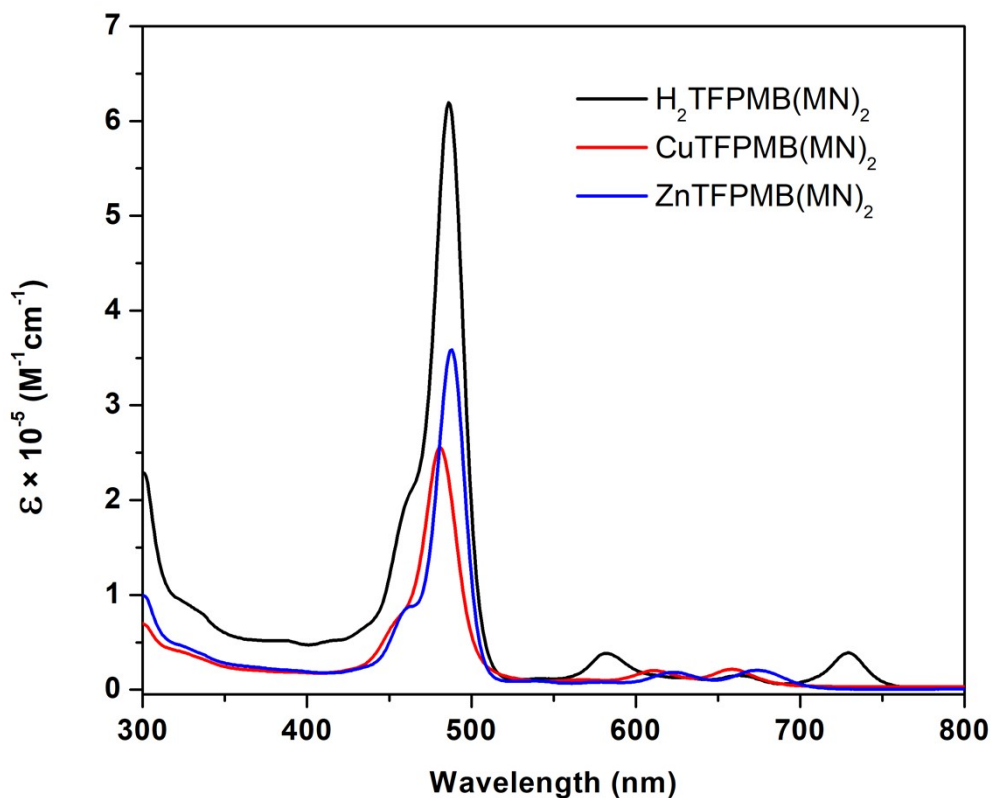

Fig. S4 Comparative absorption spectra of compounds indicated in  $\text{CH}_2\text{Cl}_2$  at 298 K.

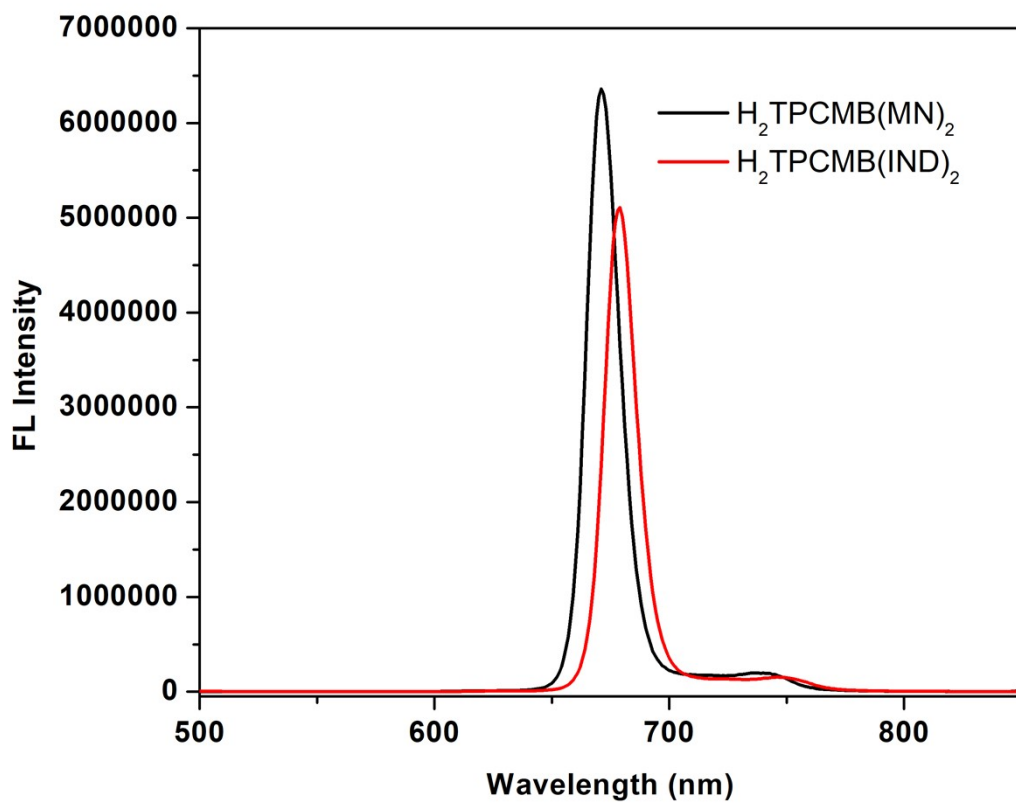

Fig. S5 Comparative emission spectra of compounds indicated in  $\text{CH}_2\text{Cl}_2$  at 298 K.

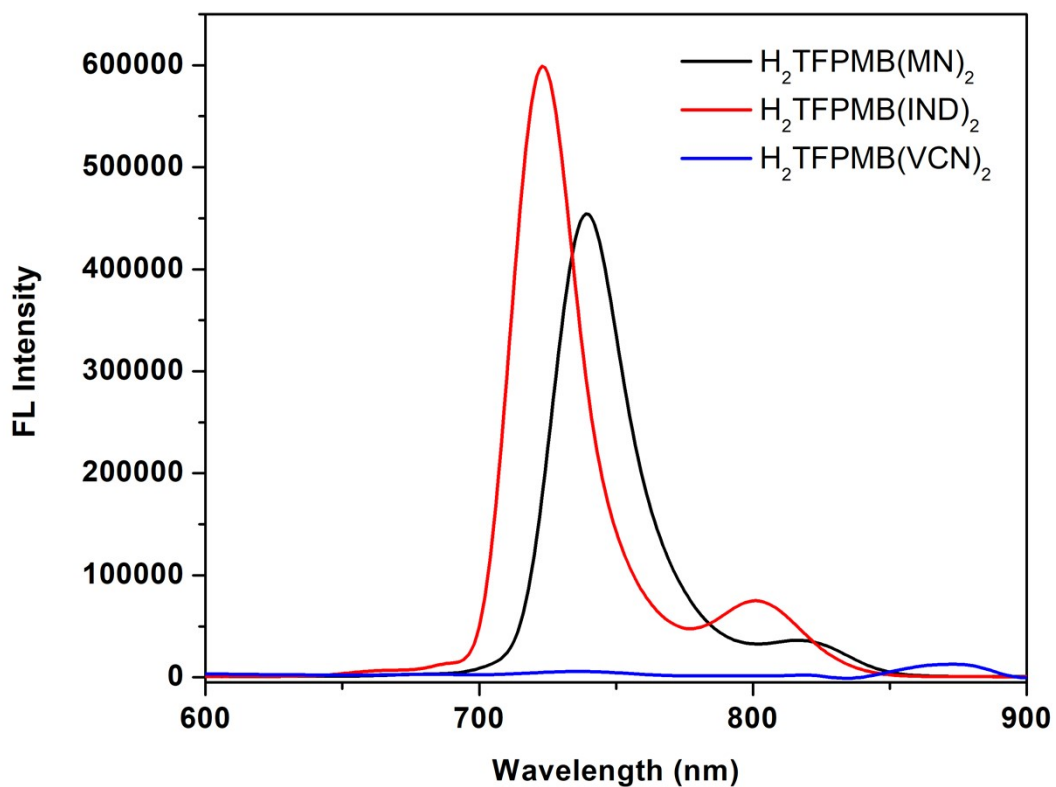

Fig. S6 Comparative emission spectra of compounds indicated in CH<sub>2</sub>Cl<sub>2</sub> at 298 K.

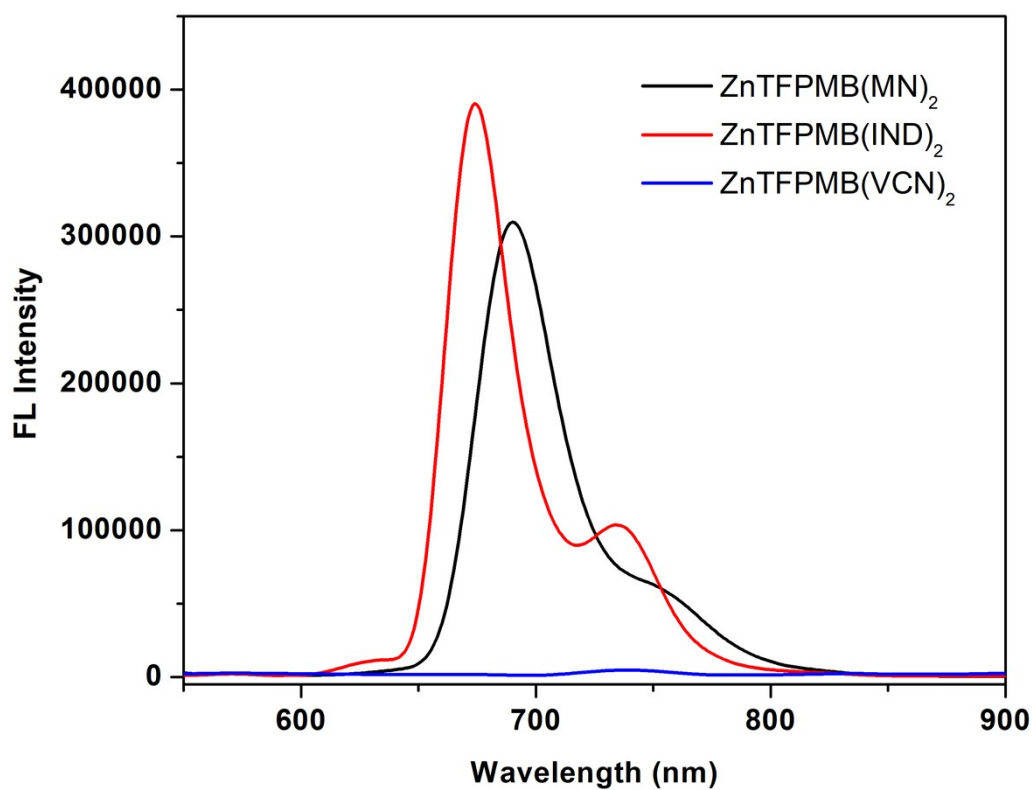

Fig. S7 Comparative emission spectra of compounds indicated in CH<sub>2</sub>Cl<sub>2</sub> at 298 K.

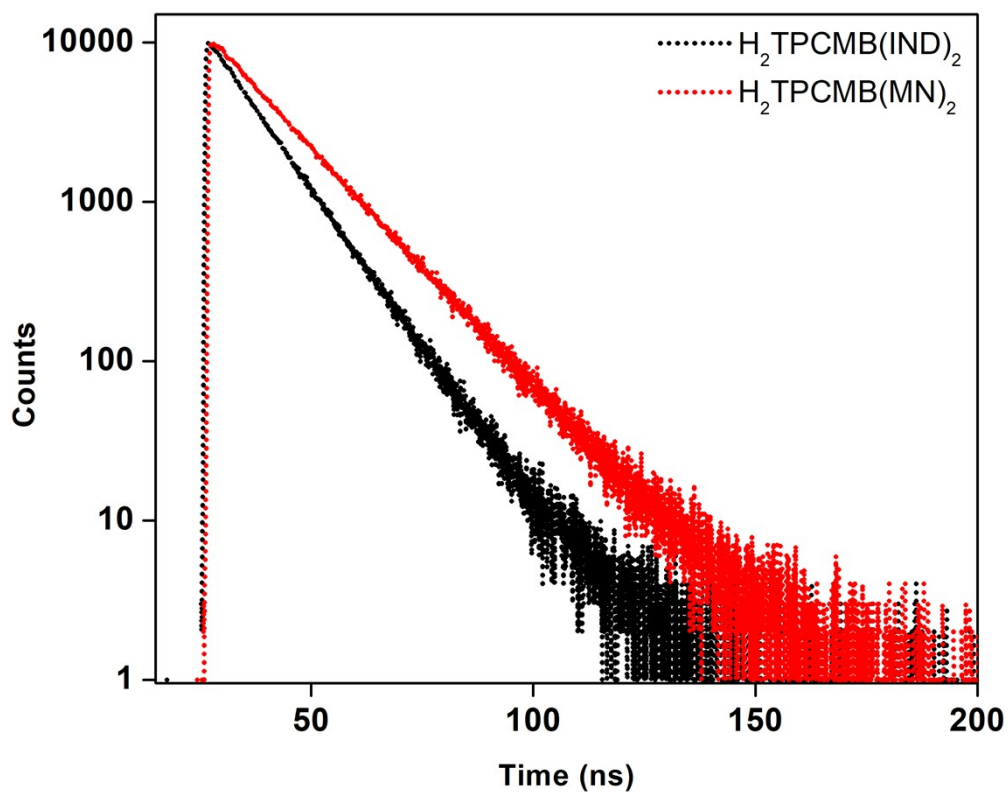

**Fig. S8** Comparative fluorescence lifetime decay profile of  $H_2TPCMB(IND)_2$  and  $H_2TPCMB(MN)_2$ .

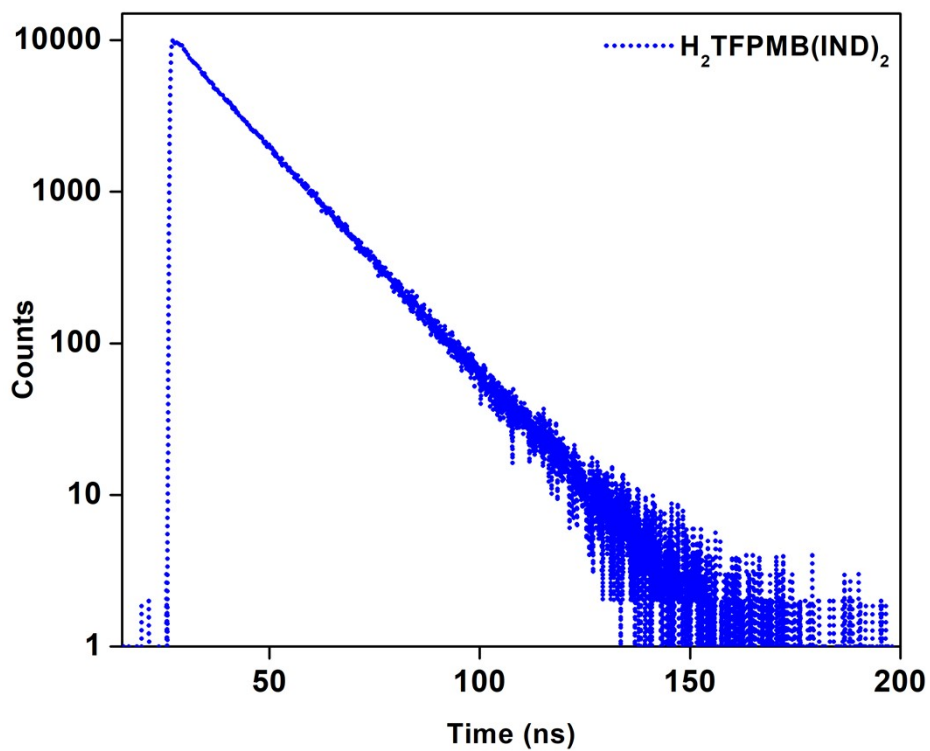

**Fig. S9** Fluorescence lifetime decay profile of  $H_2TFPMB(IND)_2$ .

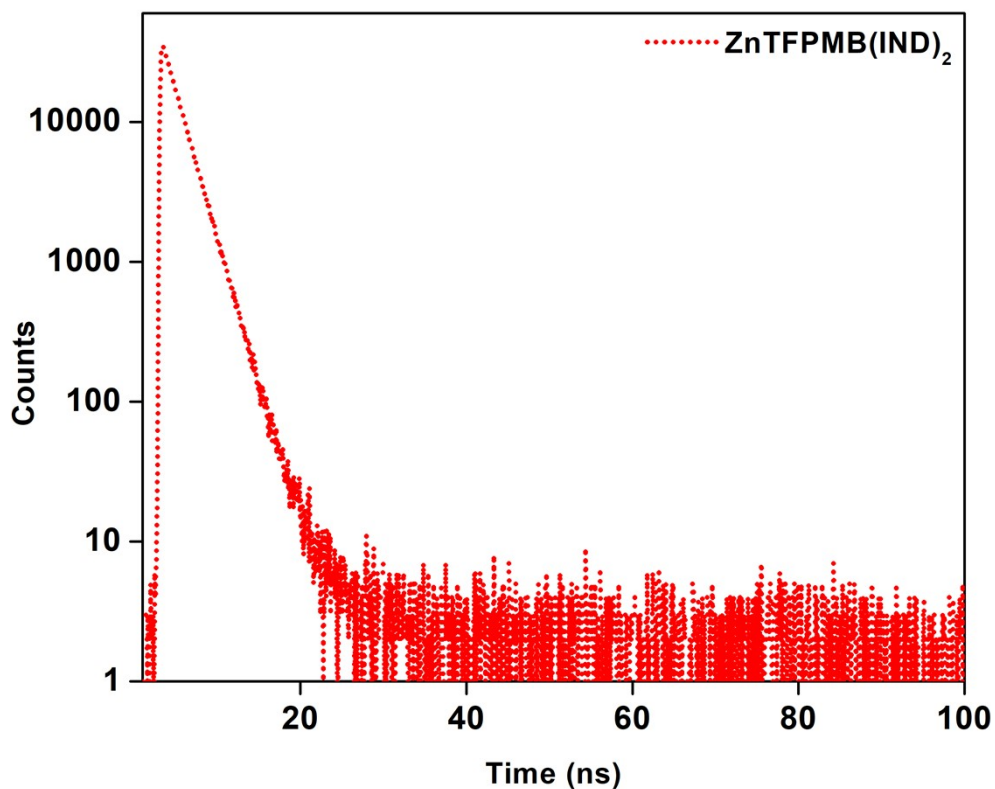

Fig. S10 Fluorescence lifetime decay profile of ZnTFPMB(IND)<sub>2</sub>.

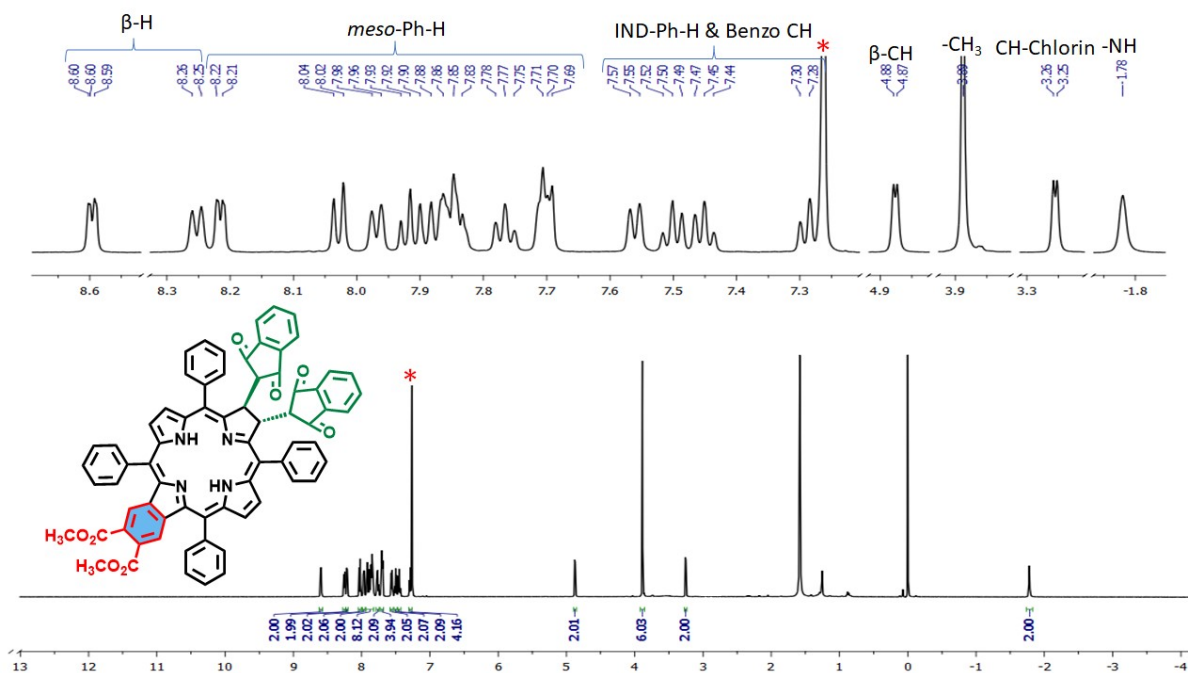

Fig. S11 <sup>1</sup>H NMR spectrum of H<sub>2</sub>TPCMB(IND)<sub>2</sub> in CDCl<sub>3</sub> at 298 K.

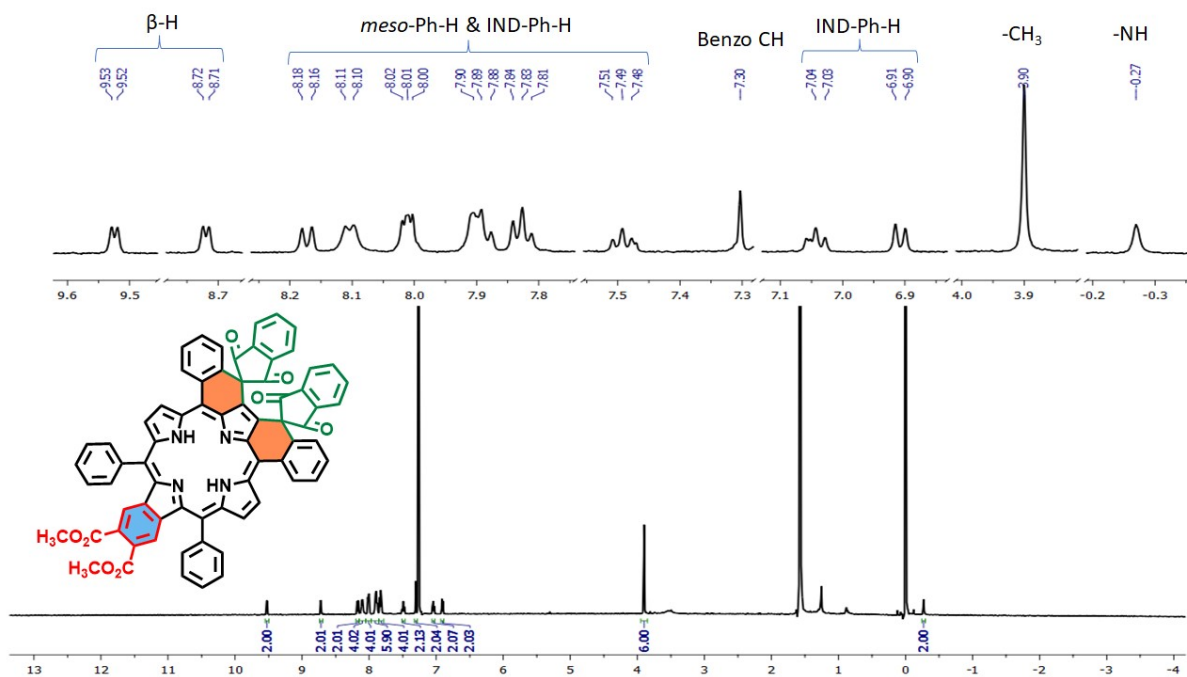

**Fig. S12** <sup>1</sup>H NMR spectrum of H<sub>2</sub>TFPMB(IND)<sub>2</sub> in CDCl<sub>3</sub> at 298 K.

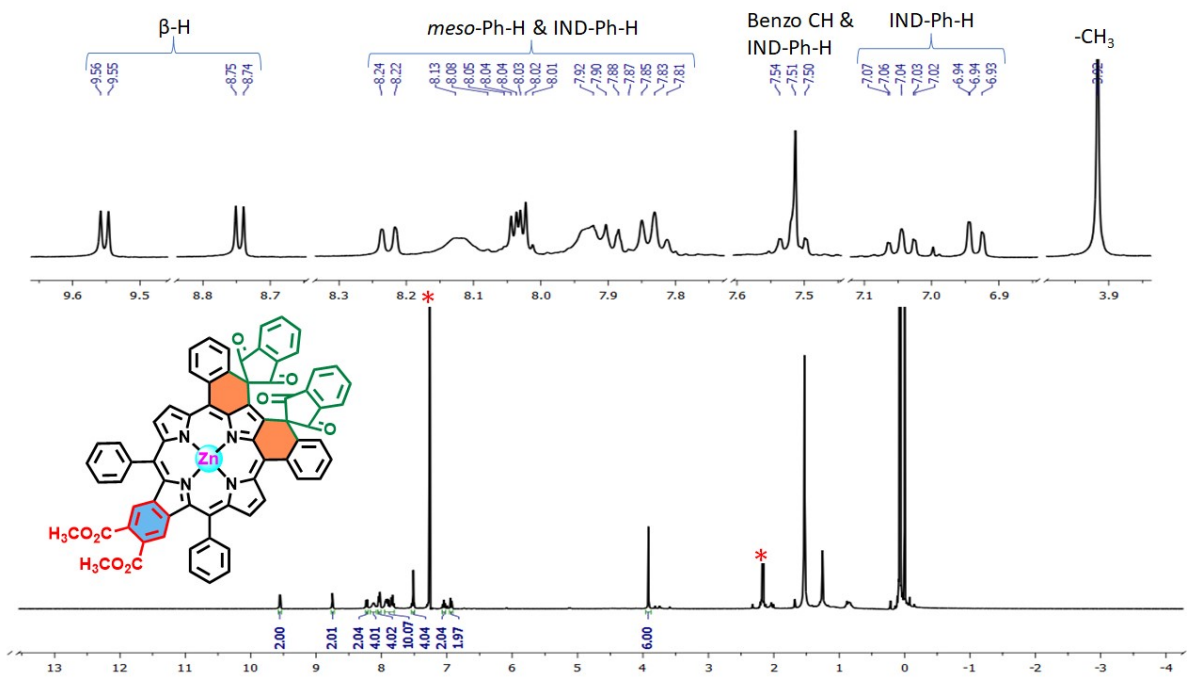

**Fig. S13** <sup>1</sup>H NMR spectrum of ZnTFPMB(IND)<sub>2</sub> in CDCl<sub>3</sub> at 298 K.



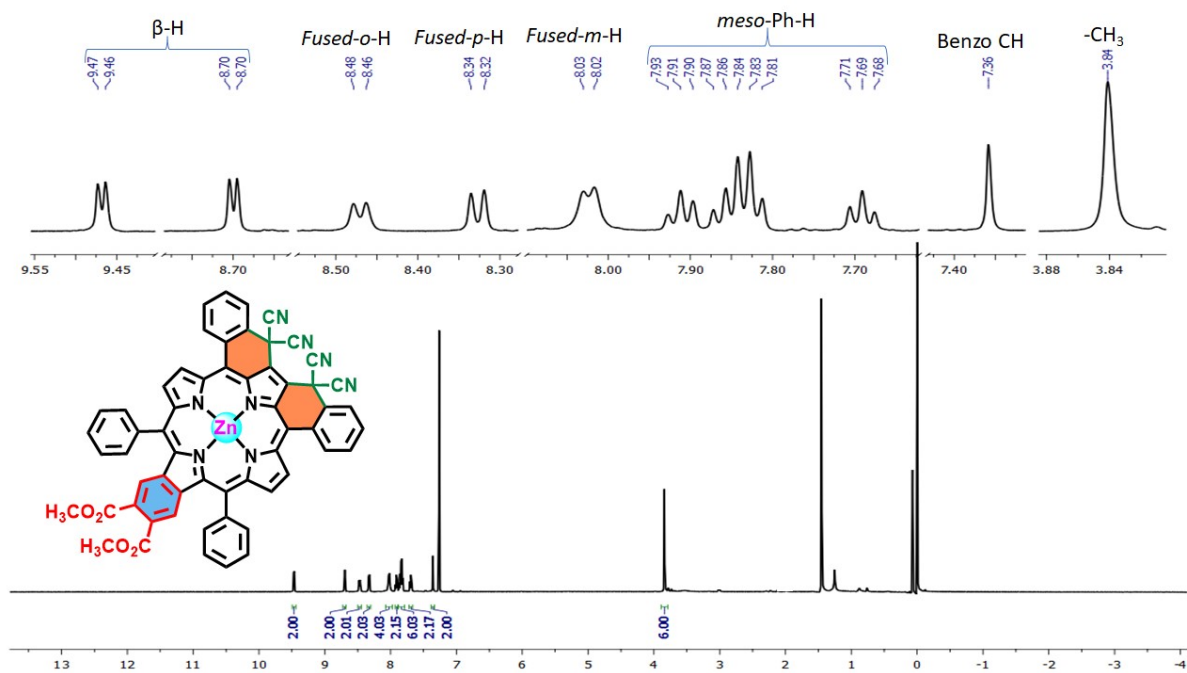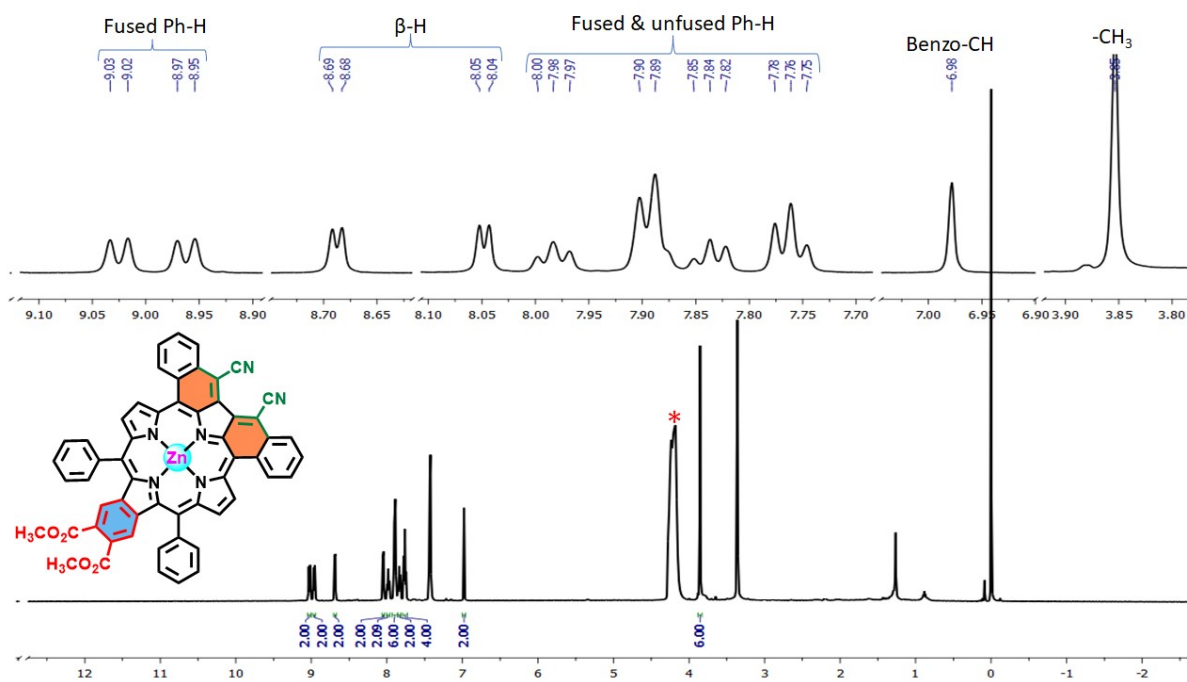

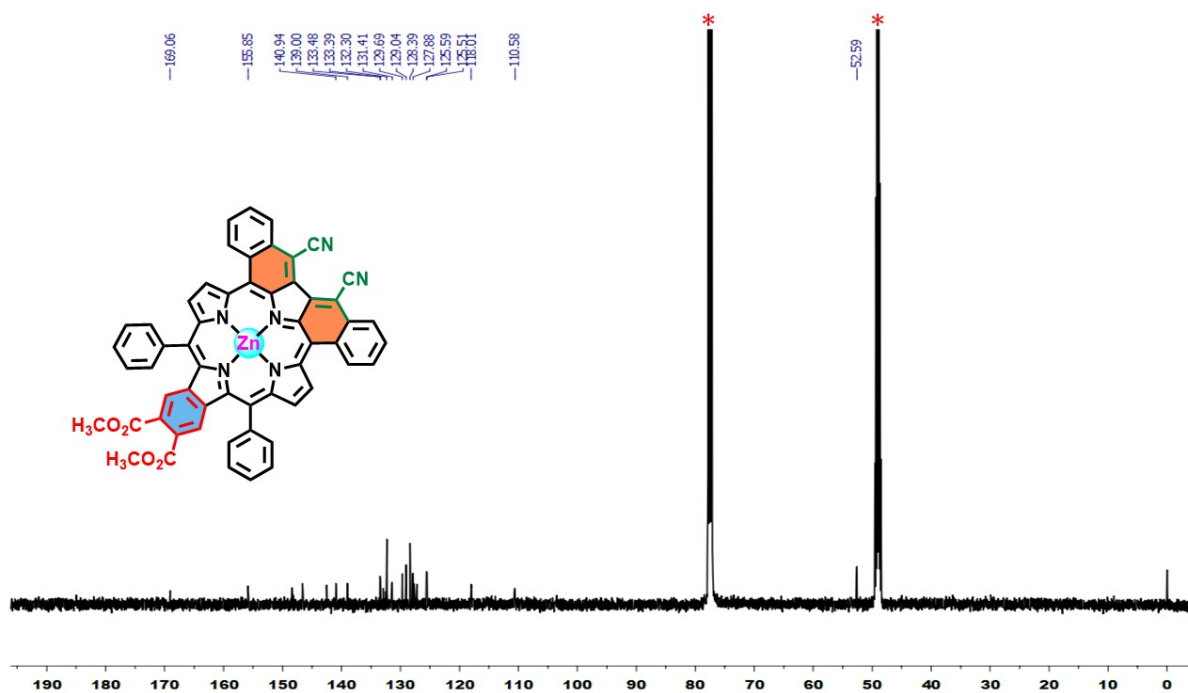

Fig. S16 <sup>13</sup>C NMR spectrum of ZnTFPMB(VCN)<sub>2</sub> in CD<sub>3</sub>OD+CDCl<sub>3</sub> at 298 K.

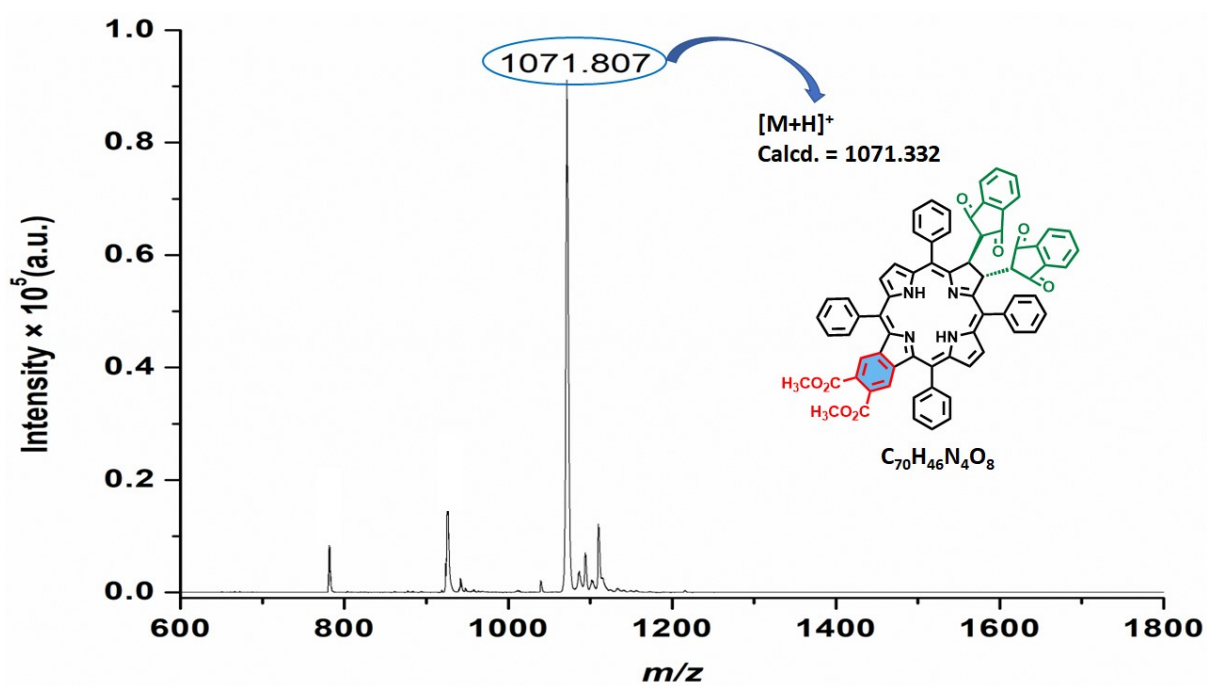

Fig. S17 MALDI-TOF mass spectrum of H<sub>2</sub>TPCMB(IND)<sub>2</sub> in positive ion mode at 298 K.

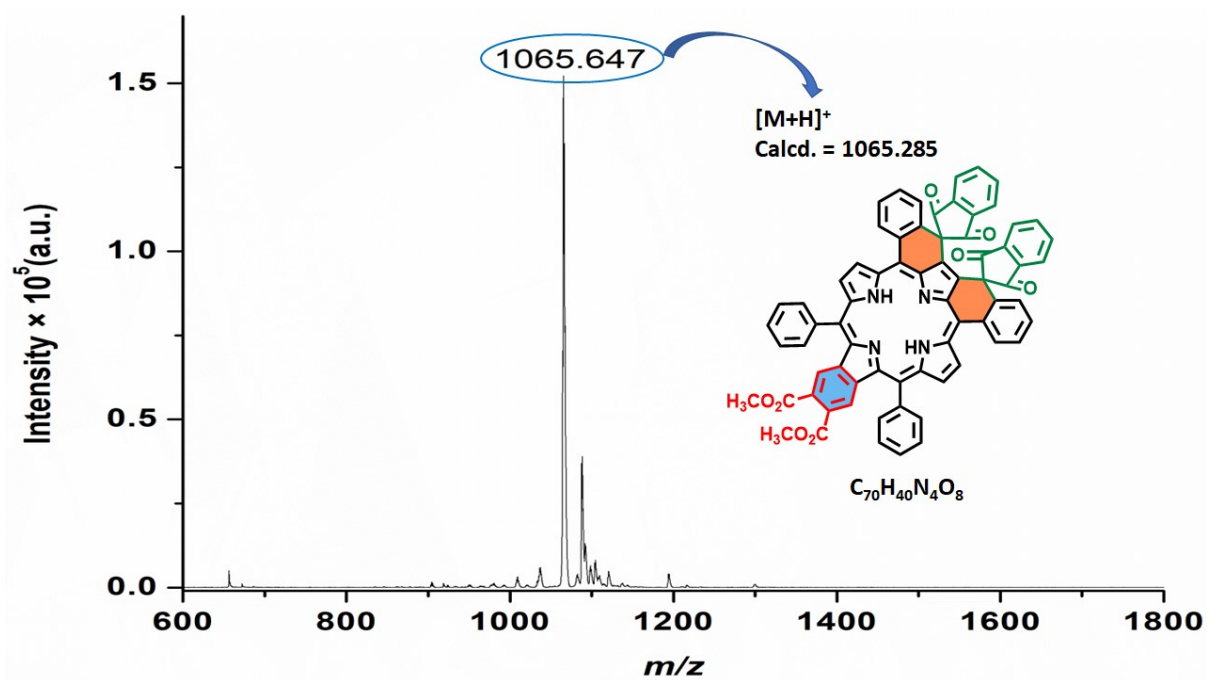

Fig. S18 MALDI-TOF mass spectrum of H<sub>2</sub>TFPMB(IND)<sub>2</sub> in positive ion mode at 298 K.

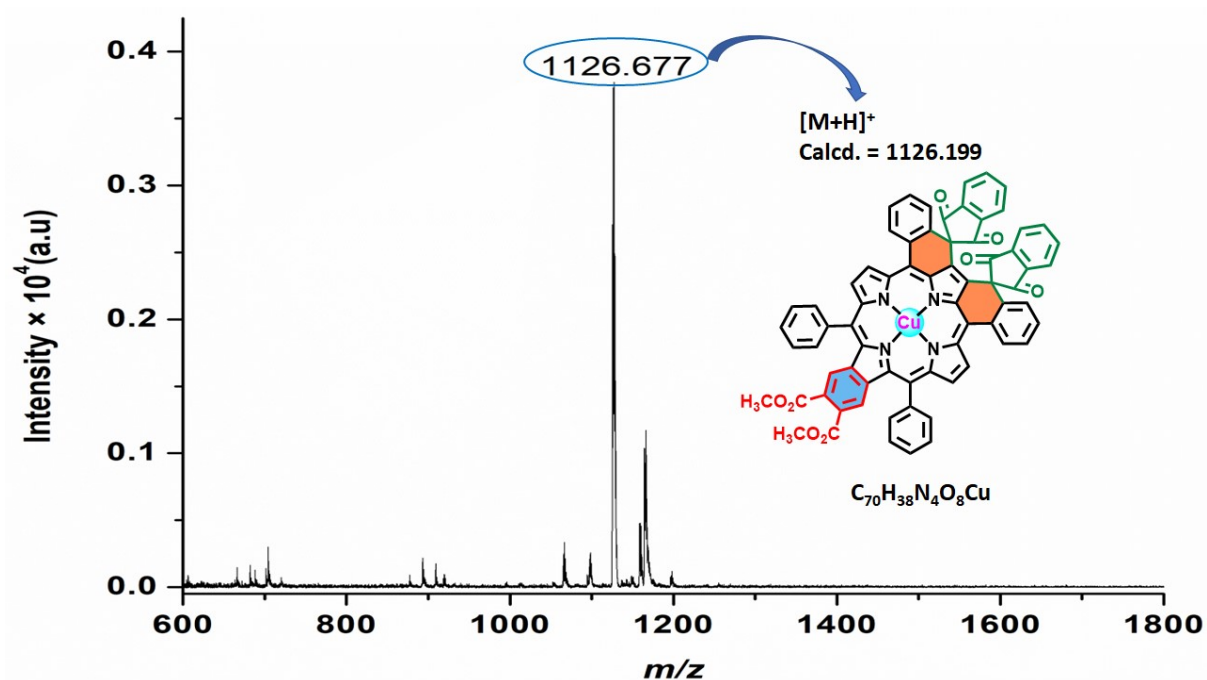

Fig. S19 MALDI-TOF mass spectrum of CuTFPMB(IND)<sub>2</sub> in positive ion mode at 298 K.

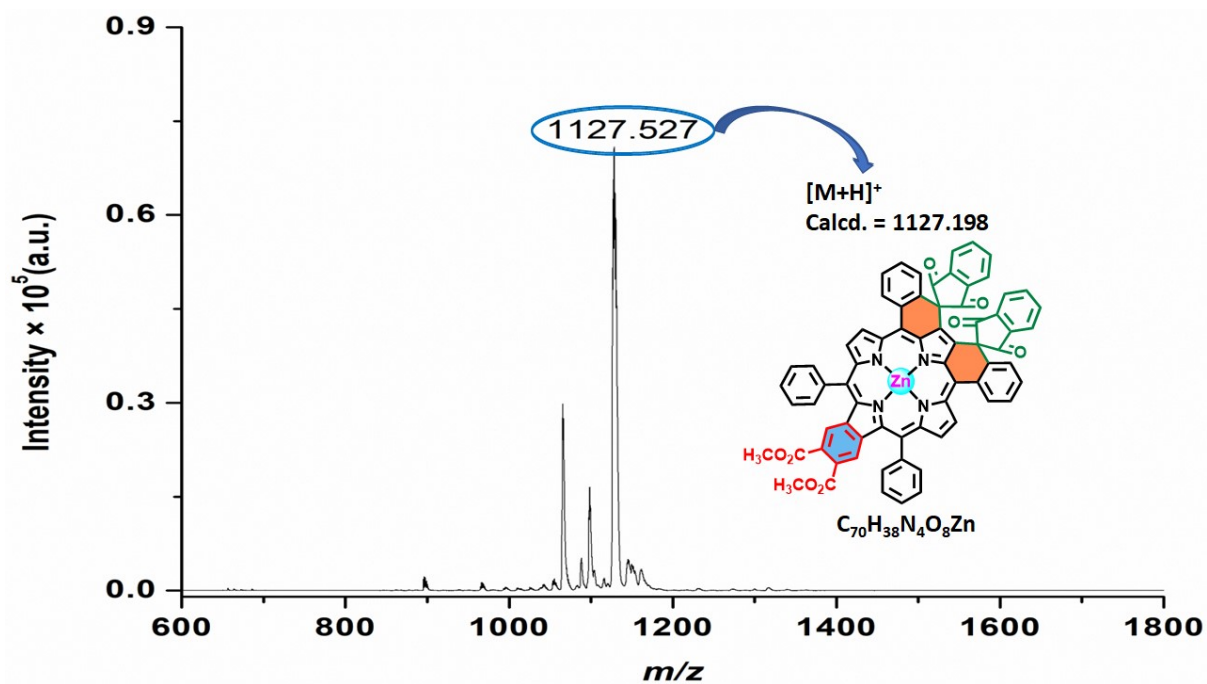

Fig. S20 MALDI-TOF mass spectrum of ZnTFPMB(IND)<sub>2</sub> in positive ion mode at 298 K.

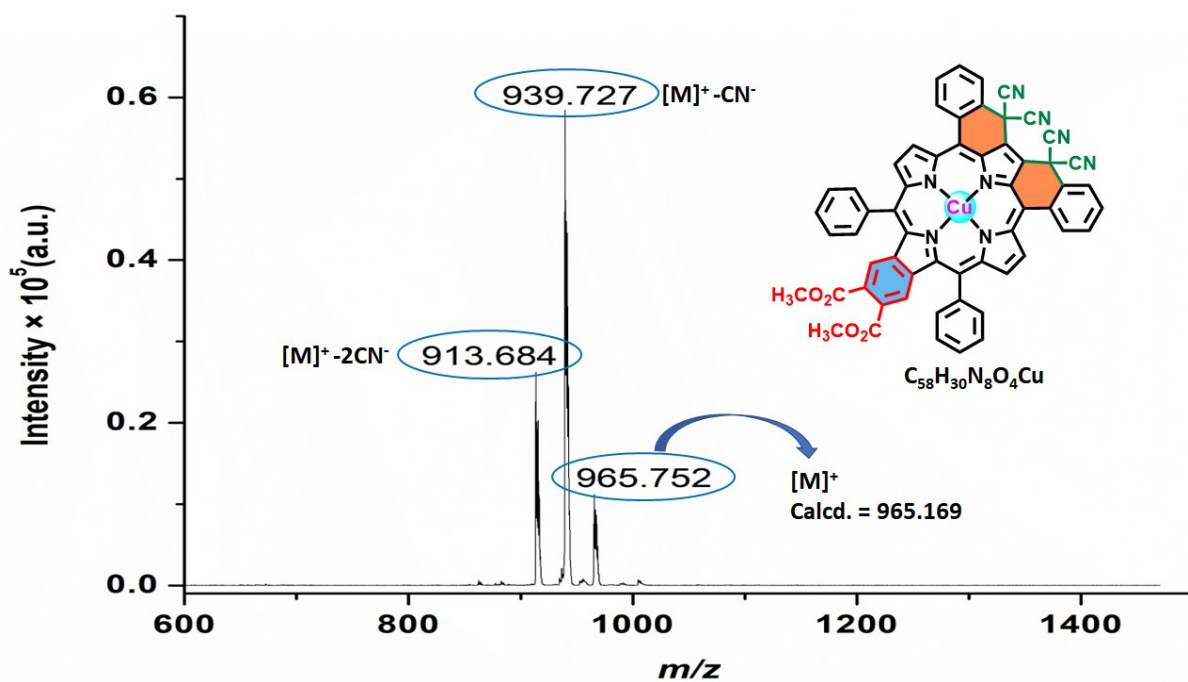

Fig. S21 MALDI-TOF mass spectrum of CuTFPMB(MN)<sub>2</sub> in positive ion mode at 298 K.

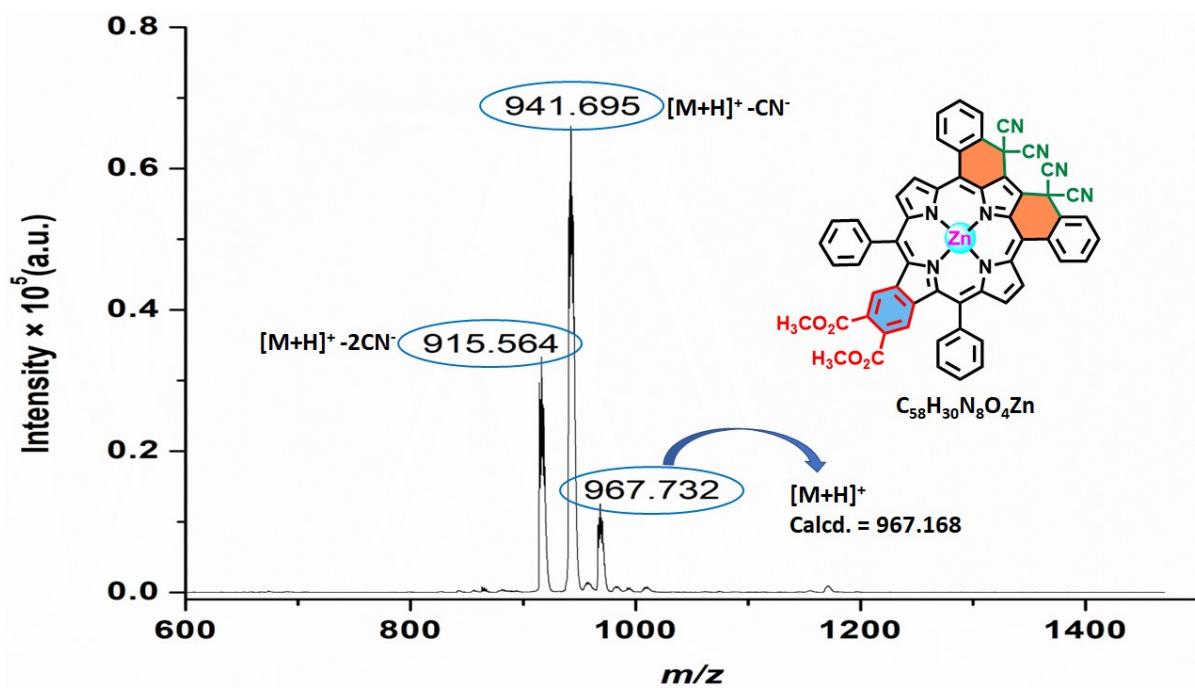

Fig. S22 MALDI-TOF mass spectrum of ZnTFPMB(MN)<sub>2</sub> in positive ion mode at 298 K.

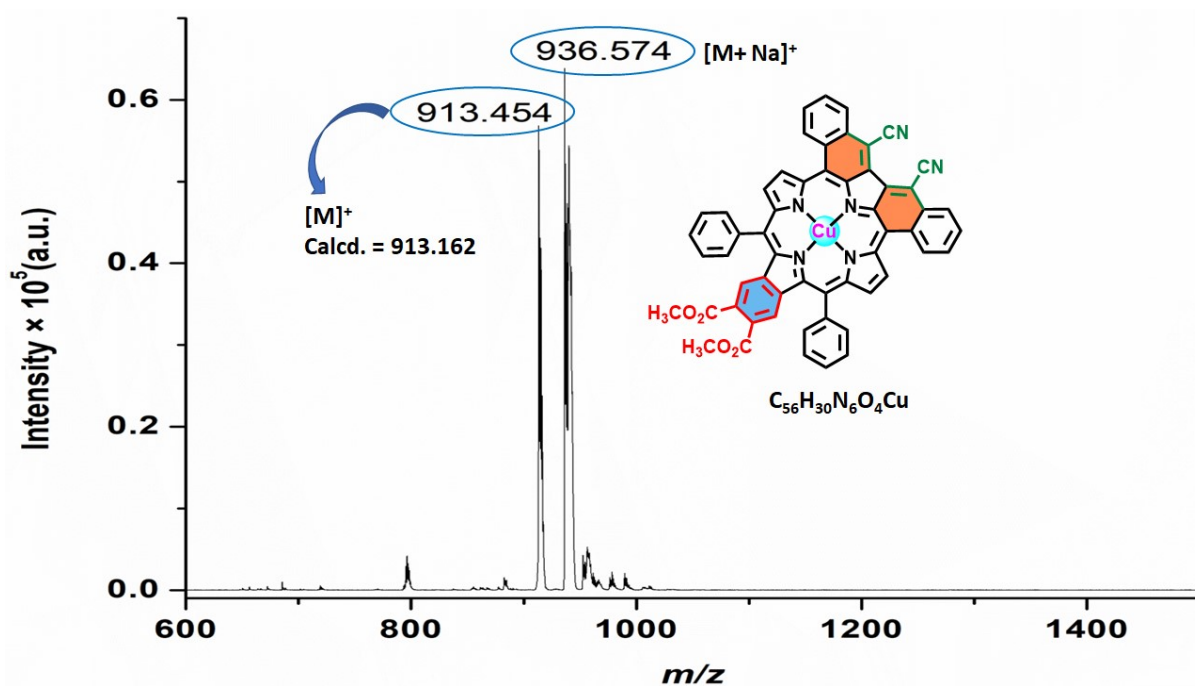

Fig. S23 MALDI-TOF mass spectrum of CuTFPMB(VCN)<sub>2</sub> in positive ion mode at 298 K.

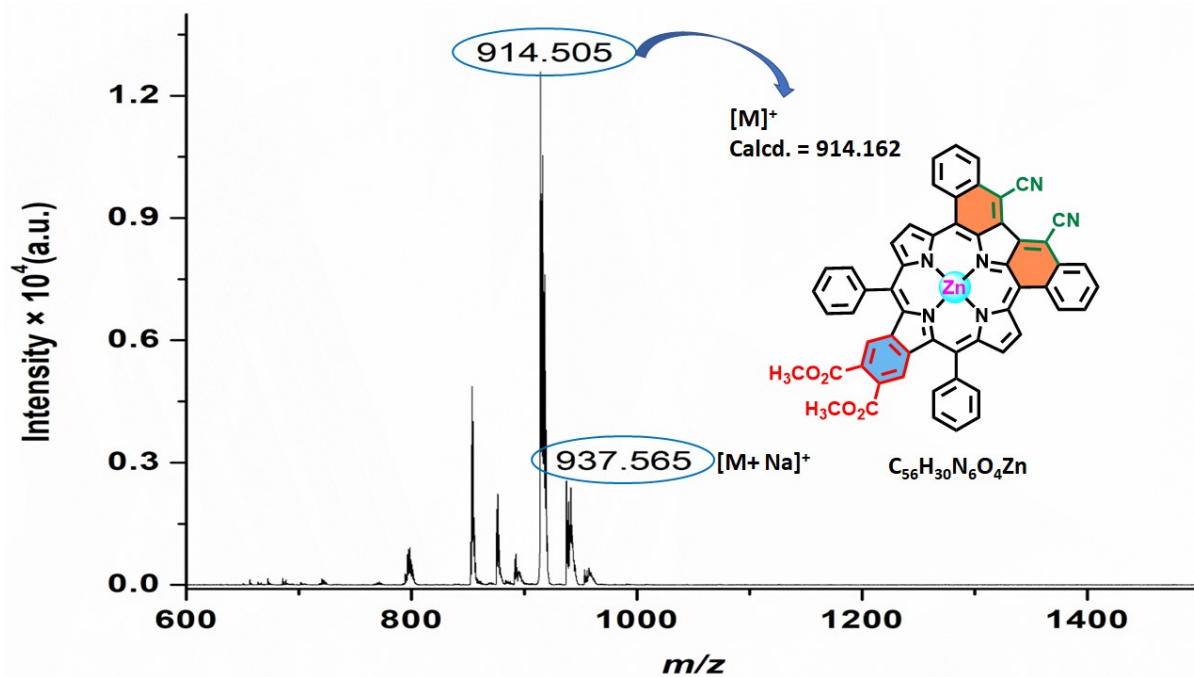

Fig. S24 MALDI-TOF mass spectrum of ZnTFPMB(VCN)<sub>2</sub> in positive ion mode at 298 K.

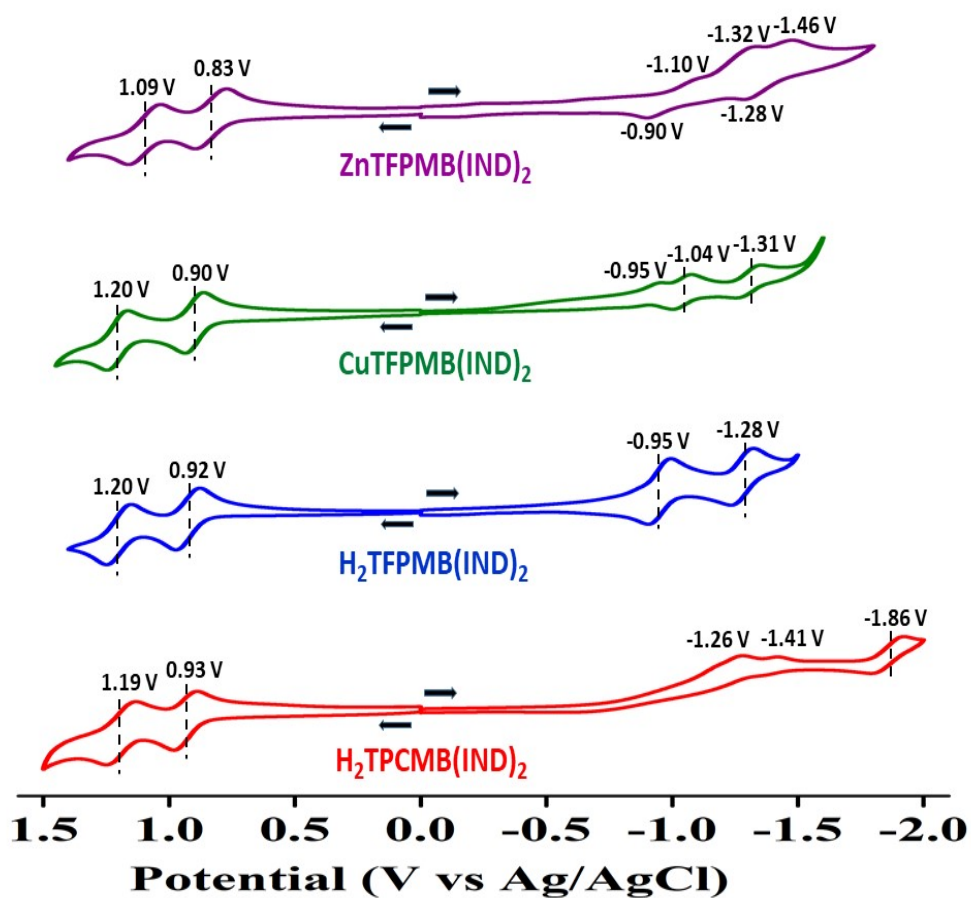

Fig. S25 Cyclic voltammograms of IND-appended porphyrinoids in CH<sub>2</sub>Cl<sub>2</sub> at 298 K using TBAPF<sub>6</sub> as a supporting electrolyte. Scan rate = 100 mV/s.



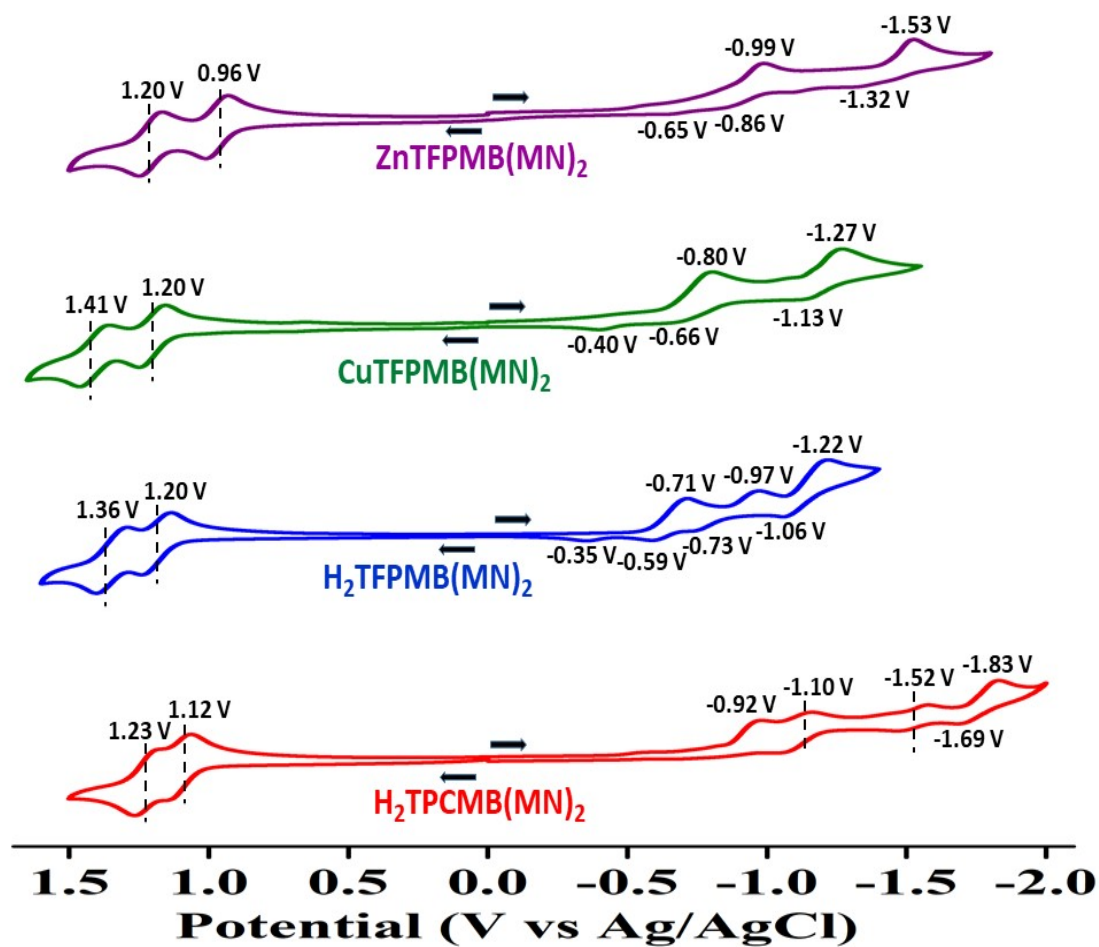

**Fig. S26** Cyclic voltammograms of MN-appended porphyrinoids in  $\text{CH}_2\text{Cl}_2$  at 298 K using  $\text{TBAPF}_6$  as a supporting electrolyte. Scan rate = 100 mV/s.

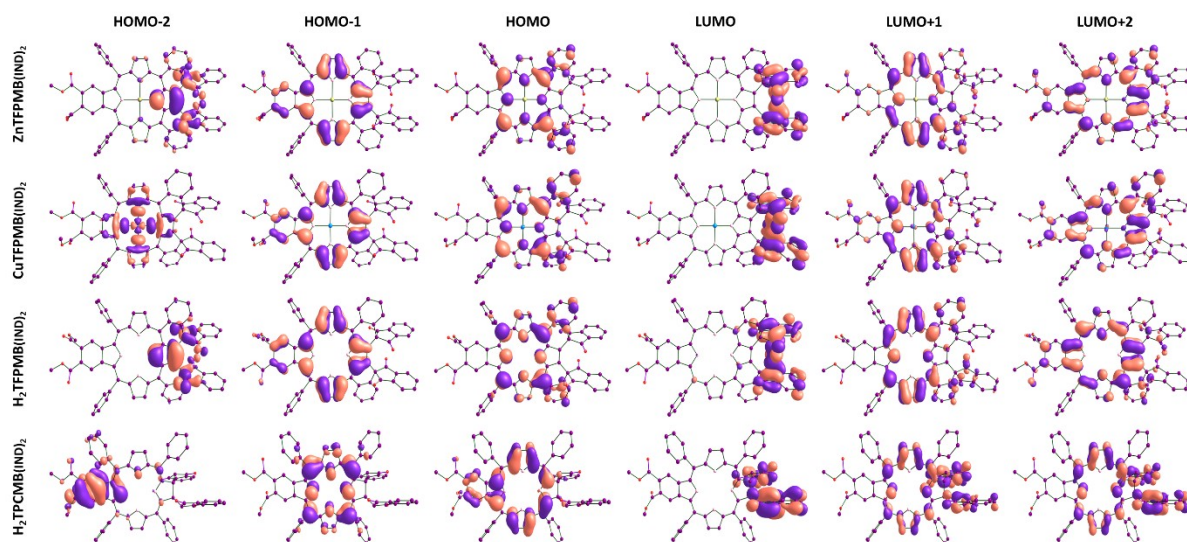

**Fig. S27** Complete FMO profile of compounds indicated.

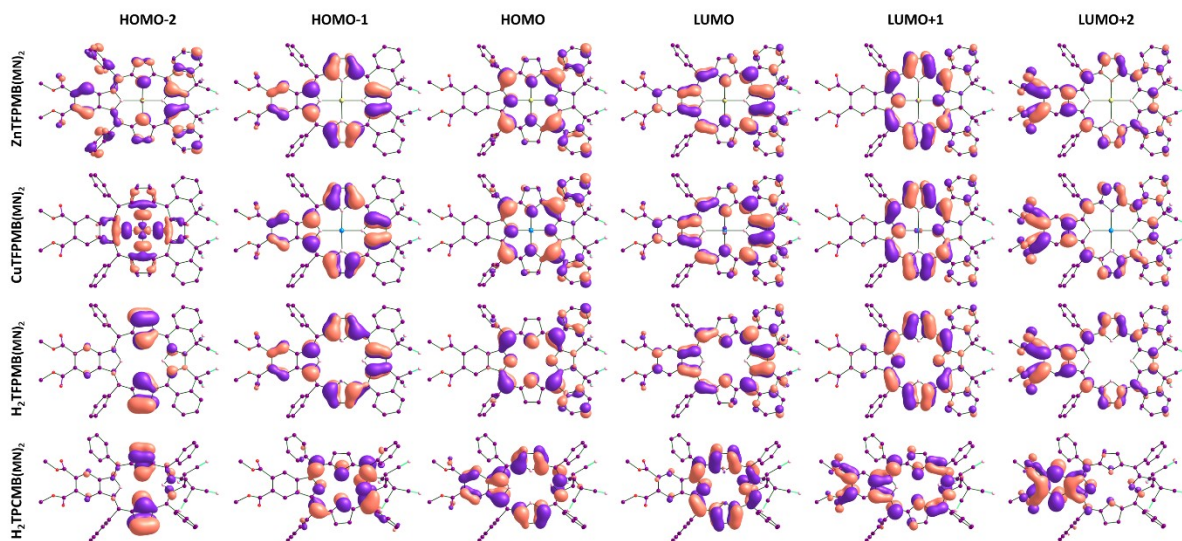

**Fig. S28** Complete FMO profile of compounds indicated.

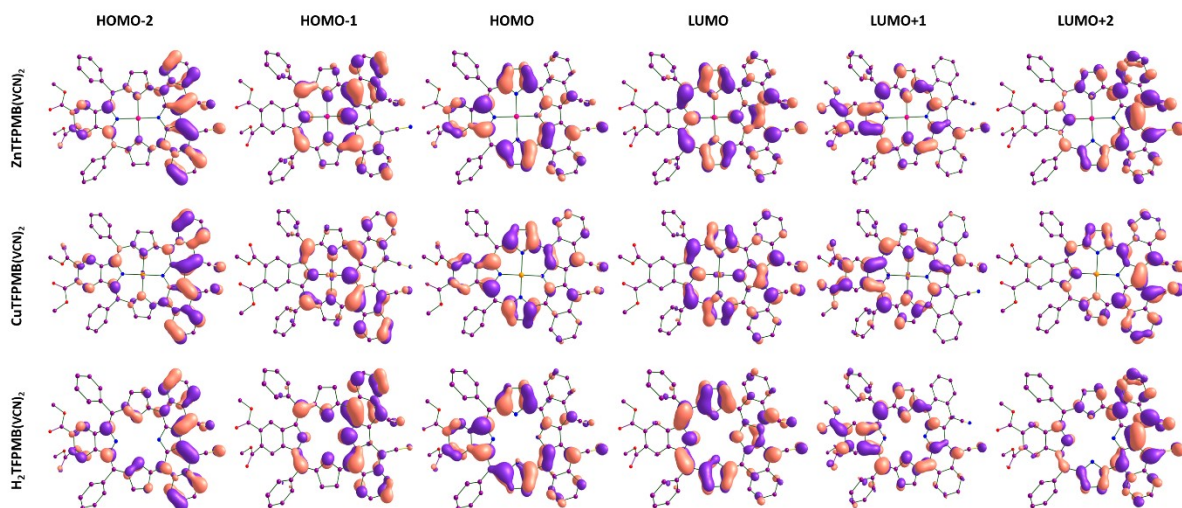

**Fig. S29** Complete FMO profile of compounds indicated.



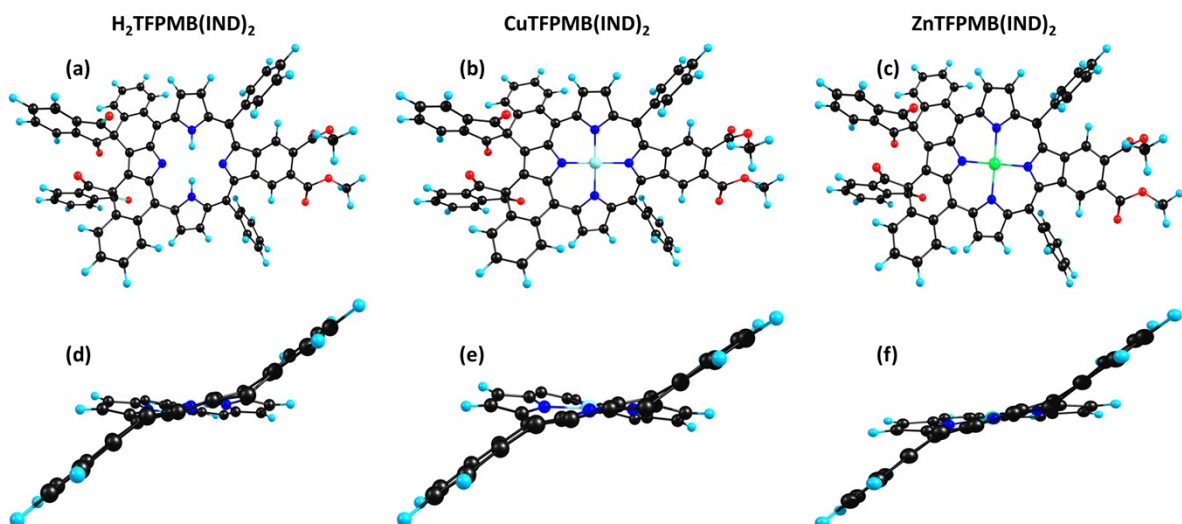

**Fig. S30** Optimized geometry (top view a, b, c) and (side view d, e, f) of  $\text{H}_2\text{TFPMB}(\text{IND})_2$ ,  $\text{CuTFPMB}(\text{IND})_2$  and  $\text{ZnTFPMB}(\text{IND})_2$  respectively. The unfused *meso*-phenyl groups are omitted for clarity in the side views.

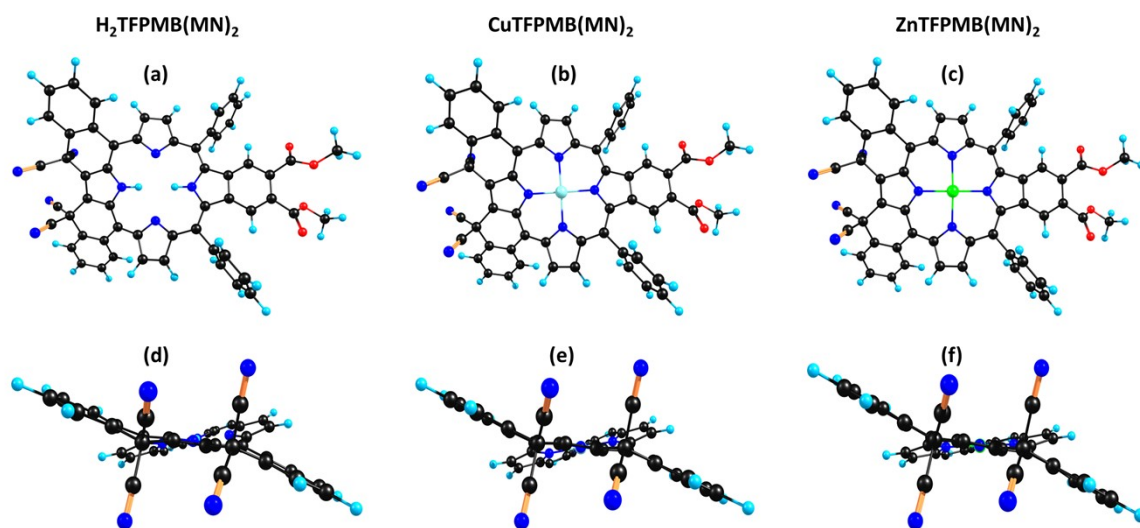

**Fig. S31** Optimized geometry (top view a, b, c) and (side view d, e, f) of  $\text{H}_2\text{TFPMB}(\text{MN})_2$ ,  $\text{CuTFPMB}(\text{MN})_2$  and  $\text{ZnTFPMB}(\text{MN})_2$  respectively. The unfused *meso*-phenyl groups are omitted for clarity in the side views.

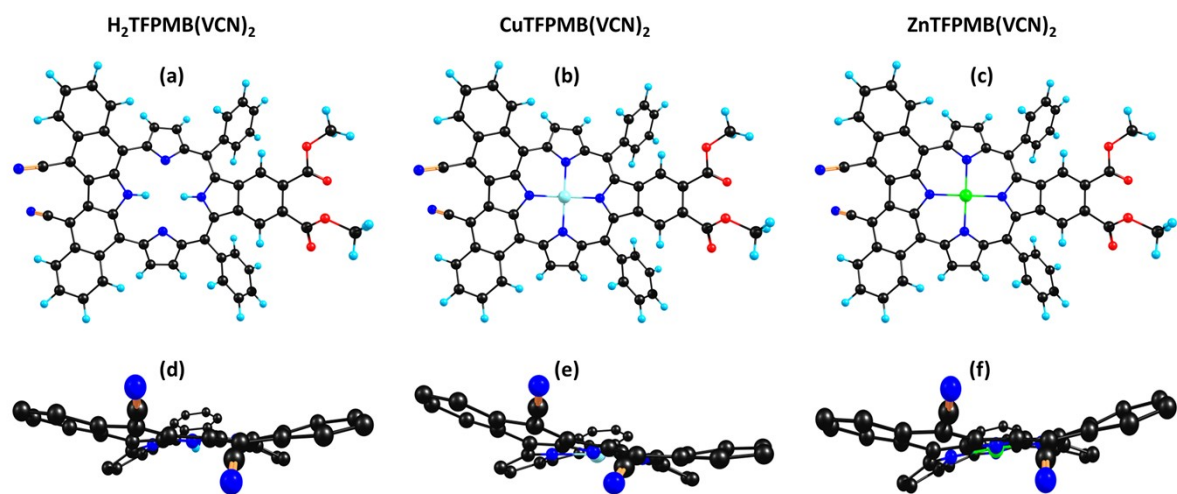

**Fig. S32** Optimized geometry (top view a, b, c) and (side view d, e, f) of  $\text{H}_2\text{TFPMB}(\text{VCN})_2$ ,  $\text{CuTFPMB}(\text{VCN})_2$  and  $\text{ZnTFPMB}(\text{VCN})_2$  respectively. The unfused *meso*-phenyl groups are omitted for clarity in the side views.

**Table S3** Selected average bond lengths and angles of synthesized IND-appended porphyrinoids.

|                                                   | H <sub>2</sub> TPCMB(IND) <sub>2</sub> | H <sub>2</sub> TFPMB(IND) <sub>2</sub> | ZnTFPMB(IND) <sub>2</sub> | CuTFPMB(IND) <sub>2</sub> |
|---------------------------------------------------|----------------------------------------|----------------------------------------|---------------------------|---------------------------|
| <b>Bond Length (Å)</b>                            |                                        |                                        |                           |                           |
| M-N                                               |                                        |                                        | 2.078                     | 2.018                     |
| M-N'                                              |                                        |                                        | 2.040                     | 1.988                     |
| N-C <sub>α</sub>                                  | 1.372                                  | 1.374                                  | 1.387                     | 1.387                     |
| N'-C <sub>α'</sub>                                | 1.388                                  | 1.384                                  | 1.394                     | 1.392                     |
| <b>C<sub>α</sub>-C<sub>β</sub></b>                | <b>1.505</b>                           | <b>1.469</b>                           | <b>1.463</b>              | <b>1.460</b>              |
| <b>C<sub>α'</sub>-C<sub>β'</sub></b>              | <b>1.437</b>                           | <b>1.437</b>                           | <b>1.456</b>              | <b>1.454</b>              |
| C <sub>β</sub> -C <sub>β</sub>                    | 1.486                                  | 1.403                                  | 1.413                     | 1.412                     |
| C <sub>β'</sub> -C <sub>β'</sub>                  | 1.374                                  | 1.377                                  | 1.377                     | 1.375                     |
| C <sub>α</sub> -C <sub>m</sub>                    | 1.407                                  | 1.410                                  | 1.416                     | 1.409                     |
| C <sub>α'</sub> -C <sub>m</sub>                   | 1.408                                  | 1.411                                  | 1.421                     | 1.414                     |
| <b>ΔC<sub>β</sub> (Å)</b>                         | <b>0.277</b>                           | <b>0.776</b>                           | <b>0.705</b>              | <b>0.804</b>              |
| <b>Δ24 (Å)</b>                                    | <b>0.156</b>                           | <b>0.586</b>                           | <b>0.535</b>              | <b>0.619</b>              |
| <b>Δ38 (Å)</b>                                    |                                        | <b>0.597</b>                           | <b>0.546</b>              | <b>0.624</b>              |
| ΔM                                                |                                        |                                        | 0.002                     | 0.000                     |
| <b>Bond Angles (°)</b>                            |                                        |                                        |                           |                           |
| M-N-C <sub>α</sub>                                |                                        |                                        | 125.91                    | 126.16                    |
| M-N'-C <sub>α'</sub>                              |                                        |                                        | 125.96                    | 126.28                    |
| N-M-N                                             |                                        |                                        | 179.86                    | 179.92                    |
| N'-M-N'                                           |                                        |                                        | 178.27                    | 178.45                    |
| N-C <sub>α</sub> -C <sub>m</sub>                  | 125.03                                 | 125.24                                 | 125.40                    | 125.40                    |
| N'-C <sub>α'</sub> -C <sub>m</sub>                | 128.00                                 | 126.29                                 | 125.80                    | 125.65                    |
| N-C <sub>α</sub> -C <sub>β</sub>                  | 110.64                                 | 110.56                                 | 109.36                    | 109.71                    |
| N'-C <sub>α'</sub> -C <sub>β'</sub>               | 106.22                                 | 106.23                                 | 108.77                    | 109.08                    |
| C <sub>β</sub> -C <sub>α</sub> -C <sub>m</sub>    | 124.30                                 | 124.10                                 | 125.20                    | 124.76                    |
| C <sub>β'</sub> -C <sub>α'</sub> -C <sub>m</sub>  | 125.75                                 | 127.23                                 | 125.33                    | 125.01                    |
| C <sub>α</sub> -C <sub>m</sub> -C <sub>α'</sub>   | 126.09                                 | 123.97                                 | 124.28                    | 122.44                    |
| C <sub>α</sub> -C <sub>β</sub> -C <sub>β</sub>    | 104.26                                 | 105.92                                 | 106.55                    | 106.46                    |
| C <sub>α'</sub> -C <sub>β'</sub> -C <sub>β'</sub> | 108.44                                 | 108.30                                 | 107.41                    | 107.29                    |
| C <sub>α</sub> -N-C <sub>α</sub>                  | 109.25                                 | 107.01                                 | 108.18                    | 107.67                    |
| C <sub>α'</sub> -N-C <sub>α'</sub>                | 110.68                                 | 110.87                                 | 107.55                    | 107.12                    |

**Table S4** Selected average bond lengths and angles of synthesized MN-appended porphyrinoids.

|                                                   | H <sub>2</sub> TPCMB(MN) <sub>2</sub> | H <sub>2</sub> TFPMB(MN) <sub>2</sub> | ZnTFPMB(MN) <sub>2</sub> | CuTFPMB(MN) <sub>2</sub> |
|---------------------------------------------------|---------------------------------------|---------------------------------------|--------------------------|--------------------------|
| <b>Bond Length (Å)</b>                            |                                       |                                       |                          |                          |
| M-N                                               |                                       |                                       | 2.073                    | 2.013                    |
| M-N'                                              |                                       |                                       | 2.045                    | 1.993                    |
| N-C <sub>α</sub>                                  | 1.383                                 | 1.366                                 | 1.388                    | 1.388                    |
| N'-C <sub>α'</sub>                                | 1.383                                 | 1.383                                 | 1.394                    | 1.393                    |
| C <sub>α</sub> -C <sub>β</sub>                    | <b>1.487</b>                          | <b>1.443</b>                          | <b>1.459</b>             | <b>1.457</b>             |
| C <sub>α'</sub> -C <sub>β'</sub>                  | <b>1.461</b>                          | <b>1.463</b>                          | <b>1.458</b>             | <b>1.455</b>             |
| C <sub>β</sub> -C <sub>β</sub>                    | 1.491                                 | 1.413                                 | 1.429                    | 1.408                    |
| C <sub>β'</sub> -C <sub>β'</sub>                  | 1.360                                 | 1.360                                 | 1.415                    | 1.374                    |
| C <sub>α</sub> -C <sub>m</sub>                    | 1.395                                 | 1.406                                 | 1.418                    | 1.412                    |
| C <sub>α'</sub> -C <sub>m</sub>                   | 1.416                                 | 1.414                                 | 1.421                    | 1.413                    |
| ΔC <sub>β</sub> (Å)                               | <b>0.390</b>                          | <b>0.745</b>                          | <b>0.713</b>             | <b>0.784</b>             |
| Δ24 (Å)                                           | <b>0.243</b>                          | <b>0.553</b>                          | <b>0.530</b>             | <b>0.598</b>             |
| Δ38 (Å)                                           |                                       | <b>0.559</b>                          | <b>0.533</b>             | <b>0.598</b>             |
| ΔM                                                |                                       |                                       | 0.000                    | 0.000                    |
| <b>Bond Angles (°)</b>                            |                                       |                                       |                          |                          |
| M-N-C <sub>α</sub>                                |                                       |                                       | 125.79                   | 126.05                   |
| M-N'-C <sub>α'</sub>                              |                                       |                                       | 125.96                   | 126.29                   |
| N-M-N                                             |                                       |                                       | 180.00                   | 180.00                   |
| N'-M-N'                                           |                                       |                                       | 177.66                   | 178.06                   |
| N-C <sub>α</sub> -C <sub>m</sub>                  | 126.04                                | 126.24                                | 125.80                   | 125.79                   |
| N'-C <sub>α'</sub> -C <sub>m</sub>                | 126.45                                | 125.65                                | 125.77                   | 125.62                   |
| N-C <sub>α</sub> -C <sub>β</sub>                  | 106.11                                | 106.55                                | 109.01                   | 109.35                   |
| N'-C <sub>α'</sub> -C <sub>β'</sub>               | 110.52                                | 110.19                                | 108.78                   | 109.09                   |
| C <sub>β</sub> -C <sub>α</sub> -C <sub>m</sub>    | 127.79                                | 127.11                                | 125.13                   | 124.69                   |
| C <sub>β'</sub> -C <sub>α'</sub> -C <sub>m</sub>  | 122.95                                | 123.93                                | 125.35                   | 125.04                   |
| C <sub>α</sub> -C <sub>m</sub> -C <sub>α'</sub>   | 125.00                                | 123.71                                | 124.00                   | 120.66                   |
| C <sub>α</sub> -C <sub>β</sub> -C <sub>β</sub>    | 104.96                                | 107.55                                | 106.78                   | 106.68                   |
| C <sub>α'</sub> -C <sub>β'</sub> -C <sub>β'</sub> | 106.73                                | 106.80                                | 107.43                   | 107.31                   |
| C <sub>α</sub> -N-C <sub>α</sub>                  | 113.44                                | 111.78                                | 108.41                   | 109.40                   |
| C <sub>α'</sub> -N-C <sub>α'</sub>                | 105.44                                | 105.90                                | 107.47                   | 107.06                   |

**Table S5** Selected average bond lengths and angles of synthesized  $\pi$ -extended trifused porphyrins.

|                                                   | H <sub>2</sub> TFPMB(VCN) <sub>2</sub> | ZnTFPMB(VCN) <sub>2</sub> | CuTFPMB(VCN) <sub>2</sub> |
|---------------------------------------------------|----------------------------------------|---------------------------|---------------------------|
| <b>Bond Length (Å)</b>                            |                                        |                           |                           |
| M-N                                               |                                        | 2.086                     | 2.034                     |
| M-N'                                              |                                        | 2.067                     | 2.020                     |
| N-C <sub>α</sub>                                  | 1.381                                  | 1.391                     | 1.392                     |
| N'-C <sub>α'</sub>                                | 1.383                                  | 1.396                     | 1.396                     |
| <b>C<sub>α</sub>-C<sub>β</sub></b>                | <b>1.441</b>                           | <b>1.458</b>              | <b>1.456</b>              |
| <b>C<sub>α'</sub>-C<sub>β'</sub></b>              | <b>1.461</b>                           | <b>1.452</b>              | <b>1.449</b>              |
| C <sub>β</sub> -C <sub>β</sub>                    | 1.445                                  | 1.443                     | 1.439                     |
| C <sub>β'</sub> -C <sub>β'</sub>                  | 1.362                                  | 1.376                     | 1.375                     |
| C <sub>α</sub> -C <sub>m</sub>                    | 1.411                                  | 1.420                     | 1.412                     |
| C <sub>α'</sub> -C <sub>m</sub>                   | 1.422                                  | 1.427                     | 1.419                     |
| <b>ΔC<sub>β</sub> (Å)</b>                         | <b>0.709</b>                           | <b>0.606</b>              | <b>0.680</b>              |
| <b>Δ24 (Å)</b>                                    | <b>0.364</b>                           | <b>0.317</b>              | <b>0.380</b>              |
| <b>Δ38 (Å)</b>                                    | <b>0.336</b>                           | <b>0.318</b>              | <b>0.360</b>              |
| ΔM                                                |                                        | 0.062                     | 0.000                     |
| <b>Bond Angles (°)</b>                            |                                        |                           |                           |
| M-N-C <sub>α</sub>                                |                                        | 125.32                    | 125.70                    |
| M-N'-C <sub>α'</sub>                              |                                        | 125.12                    | 125.49                    |
| N-M-N                                             |                                        | 177.17                    | 178.95                    |
| N'-M-N'                                           |                                        | 175.74                    | 175.07                    |
| N-C <sub>α</sub> -C <sub>m</sub>                  | 126.18                                 | 125.74                    | 125.75                    |
| N'-C <sub>α'</sub> -C <sub>m</sub>                | 124.97                                 | 125.56                    | 125.22                    |
| N-C <sub>α</sub> -C <sub>β</sub>                  | 106.99                                 | 109.53                    | 109.87                    |
| N'-C <sub>α'</sub> -C <sub>β'</sub>               | 110.22                                 | 109.00                    | 109.35                    |
| C <sub>β</sub> -C <sub>α</sub> -C <sub>m</sub>    | 126.67                                 | 124.65                    | 124.23                    |
| C <sub>β'</sub> -C <sub>α'</sub> -C <sub>m</sub>  | 124.75                                 | 125.39                    | 125.32                    |
| C <sub>α</sub> -C <sub>m</sub> -C <sub>α'</sub>   | 123.29                                 | 123.43                    | 121.82                    |
| C <sub>α</sub> -C <sub>β</sub> -C <sub>β</sub>    | 106.94                                 | 106.11                    | 106.06                    |
| C <sub>α'</sub> -C <sub>β'</sub> -C <sub>β'</sub> | 106.77                                 | 107.39                    | 107.26                    |
| C <sub>α</sub> -N-C <sub>α</sub>                  | 111.83                                 | 108.32                    | 107.06                    |
| C <sub>α'</sub> -N-C <sub>α'</sub>                | 105.75                                 | 107.01                    | 106.41                    |

**Table S6** Theoretically calculated ground state dipole moment and HOMO-LUMO energy gap of the synthesized porphyrinoids.

| Porphyrinoids                          | Theoretically calculated Dipole moment (D) | HOMO-LUMO Energy Gap (eV) |
|----------------------------------------|--------------------------------------------|---------------------------|
| H <sub>2</sub> TPCMB(IND) <sub>2</sub> | 10.62                                      | 2.485                     |
| H <sub>2</sub> TFPMB(IND) <sub>2</sub> | 10.27                                      | 2.337                     |
| CuTFPMB(IND) <sub>2</sub>              | 10.58                                      | 2.253                     |
| ZnTFPMB(IND) <sub>2</sub>              | 10.49                                      | 2.292                     |
| H <sub>2</sub> TPCMB(MN) <sub>2</sub>  | 6.74                                       | 2.343                     |
| H <sub>2</sub> TFPMB(MN) <sub>2</sub>  | 11.59                                      | 2.337                     |
| CuTFPMB(MN) <sub>2</sub>               | 11.74                                      | 2.357                     |
| ZnTFPMB(MN) <sub>2</sub>               | 11.85                                      | 2.340                     |
| H <sub>2</sub> TFPMB(VCN) <sub>2</sub> | 9.38                                       | 1.992                     |
| CuTFPMB(VCN) <sub>2</sub>              | 8.60                                       | 1.933                     |
| ZnTFPMB(VCN) <sub>2</sub>              | 8.78                                       | 1.955                     |

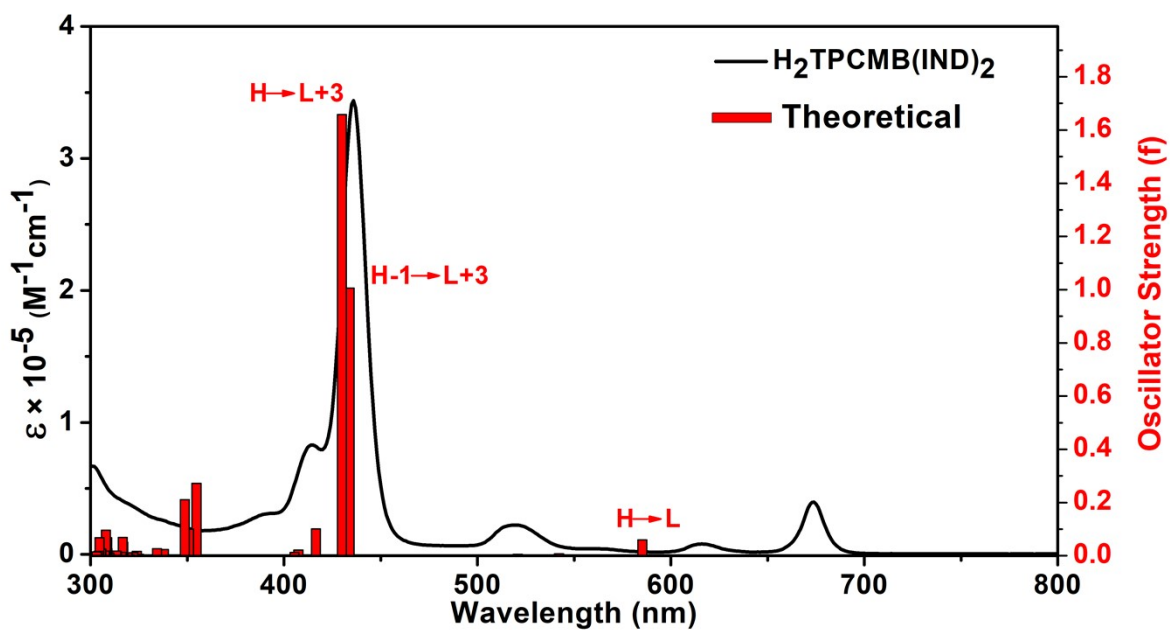

**Fig. S33** Comparative (theoretical and experimental) absorption spectra of H<sub>2</sub>TPCMB(IND)<sub>2</sub>.

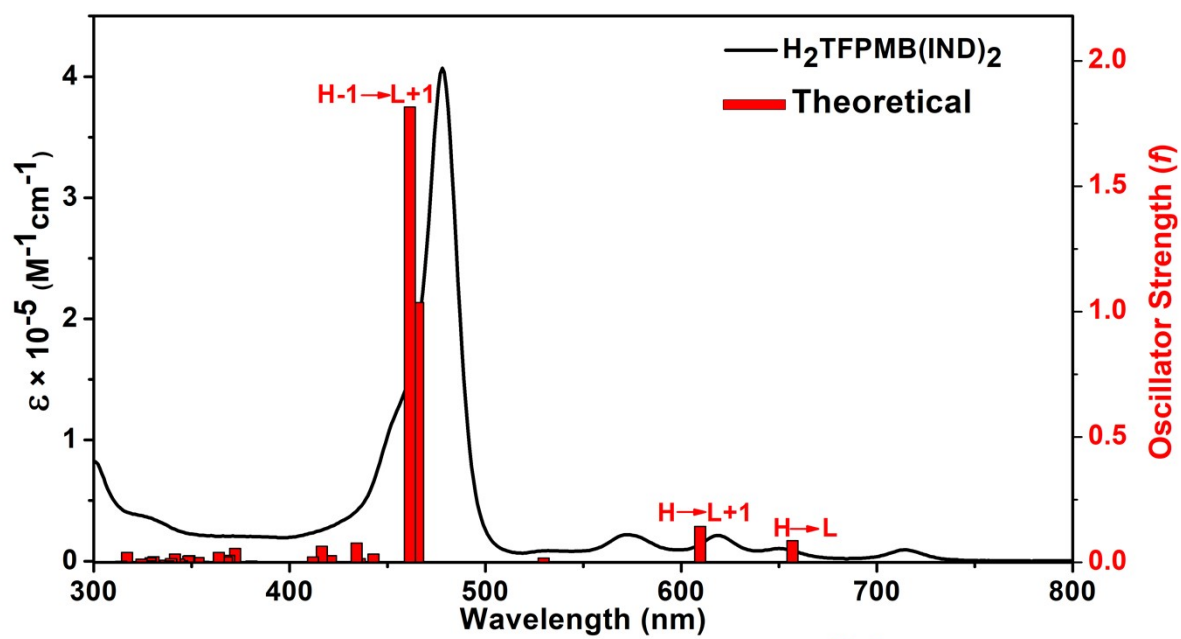

Fig. S34 Comparative (theoretical and experimental) absorption spectra of  $H_2TFPMB(IND)_2$ .

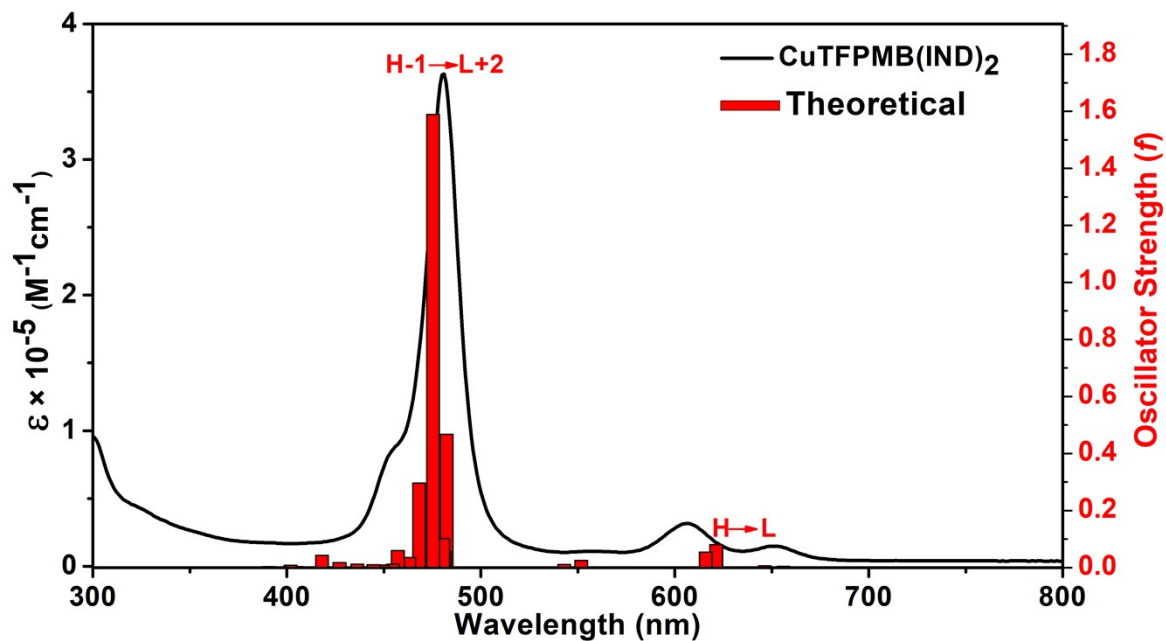

Fig. S35 Comparative (theoretical and experimental) absorption spectra of  $CuTFPMB(IND)_2$ .

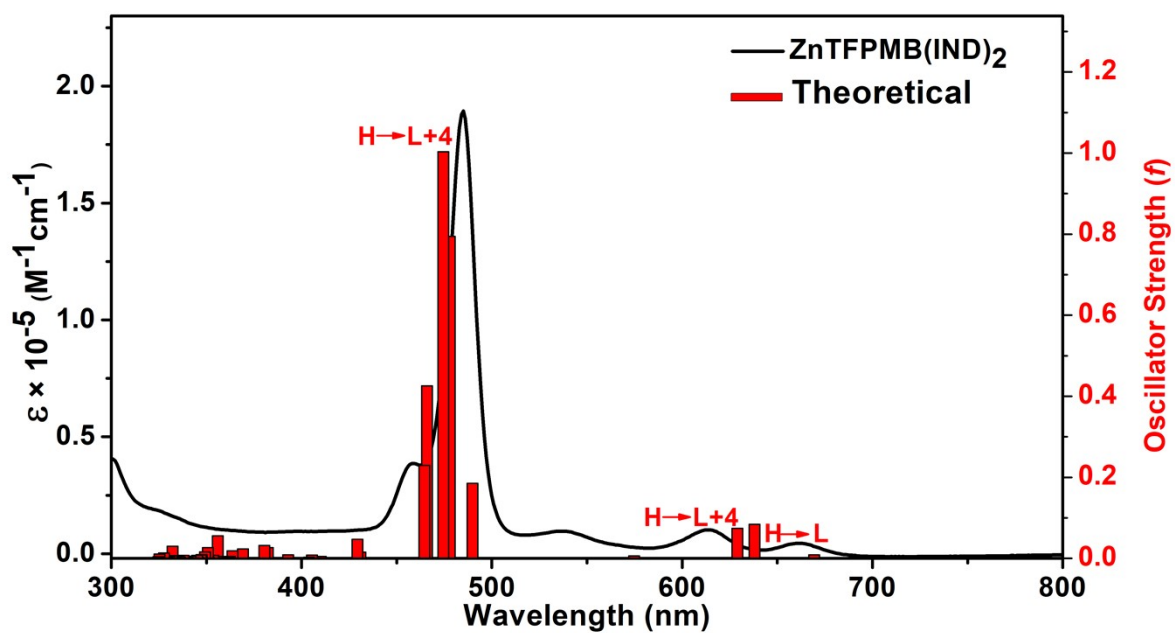

Fig. S36 Comparative (theoretical and experimental) absorption spectra of ZnTFPMB(IND)<sub>2</sub>.

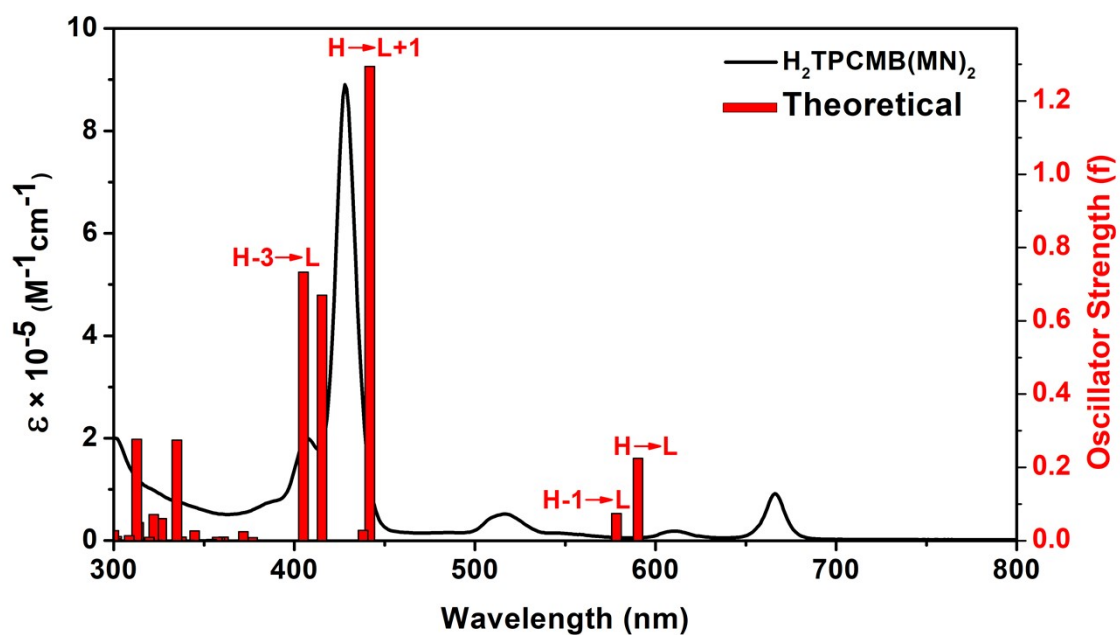

Fig. S37 Comparative (theoretical and experimental) absorption spectra of H<sub>2</sub>TPCMB(MN)<sub>2</sub>.



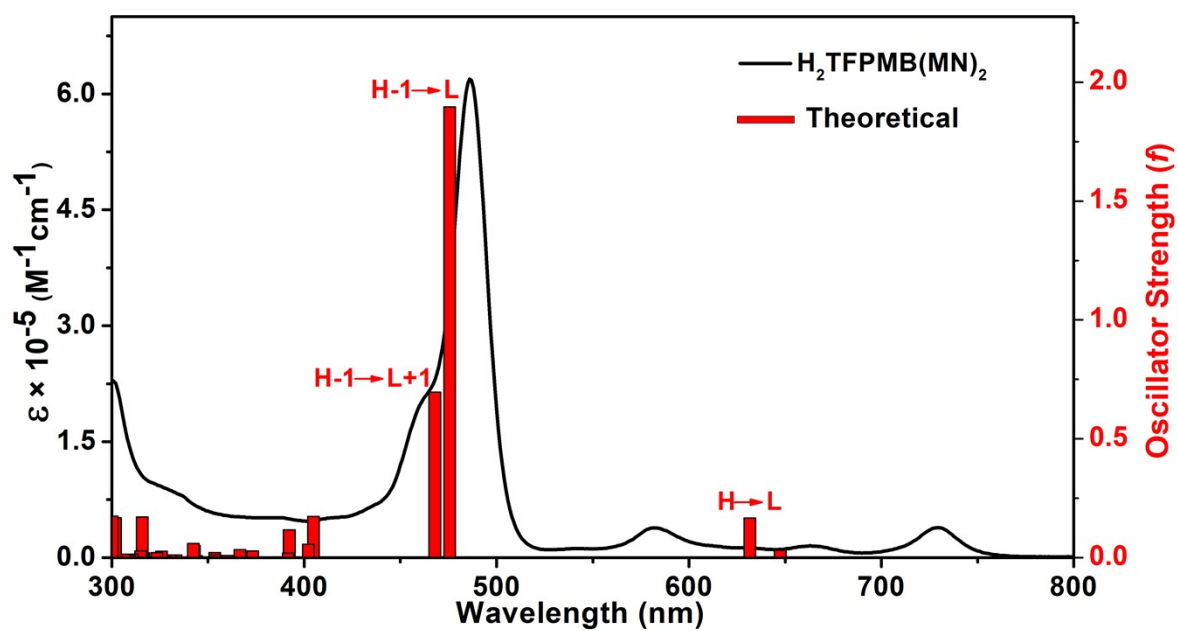

Fig. S38 Comparative (theoretical and experimental) absorption spectra of  $H_2TFPMB(MN)_2$ .

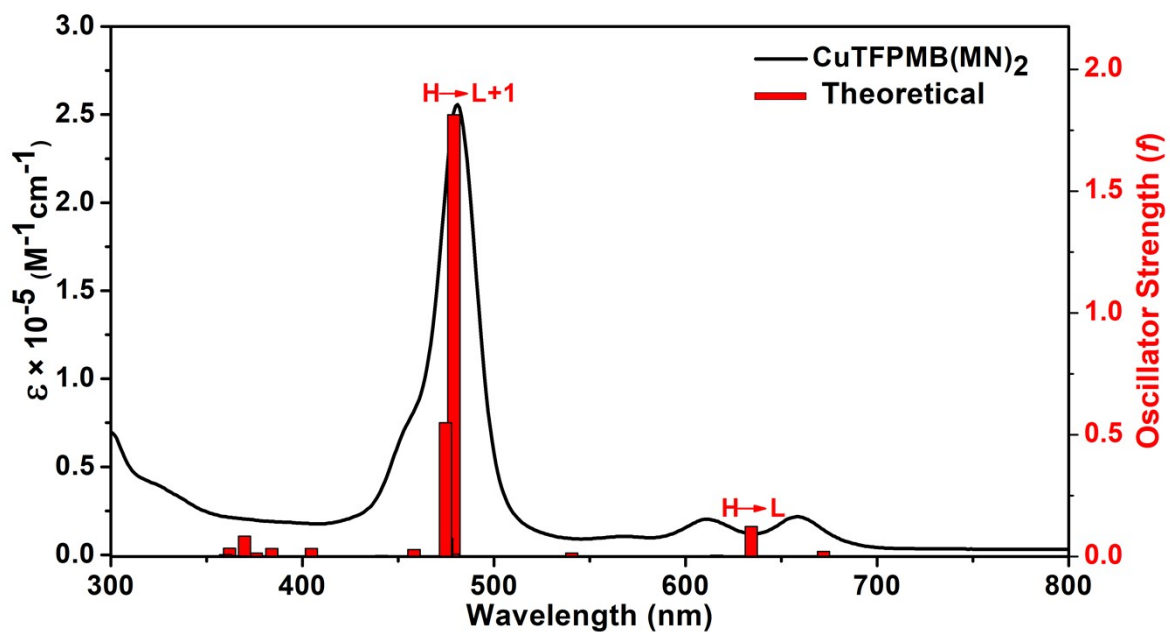

Fig. S39 Comparative (theoretical and experimental) absorption spectra of  $CuTFPMB(MN)_2$ .

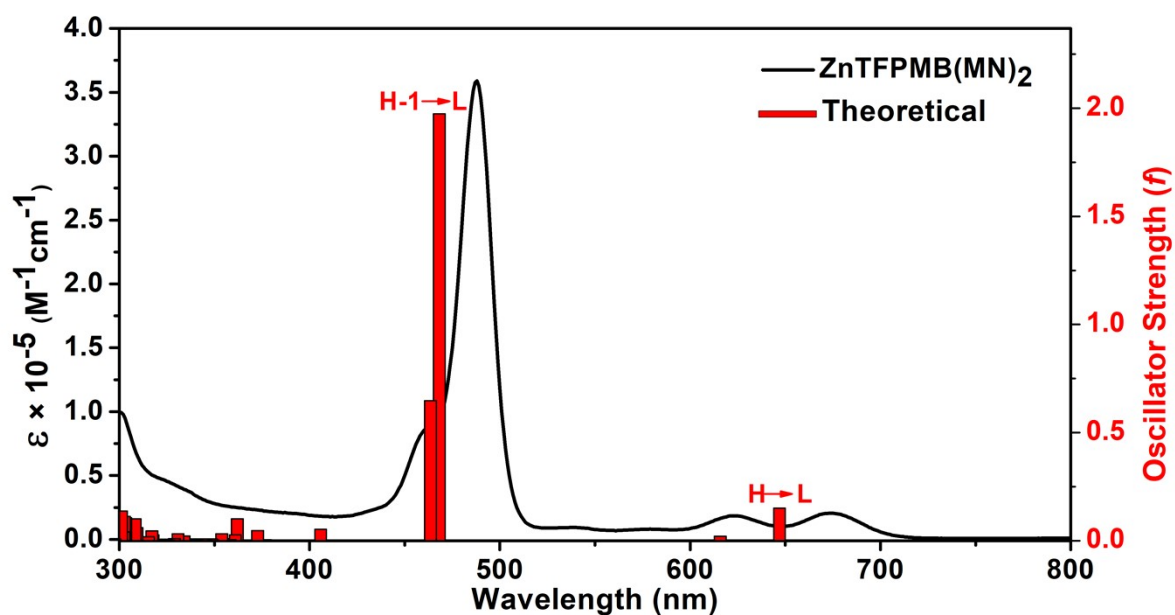

Fig. S40 Comparative (theoretical and experimental) absorption spectra of ZnTFPMB(MN)<sub>2</sub>.

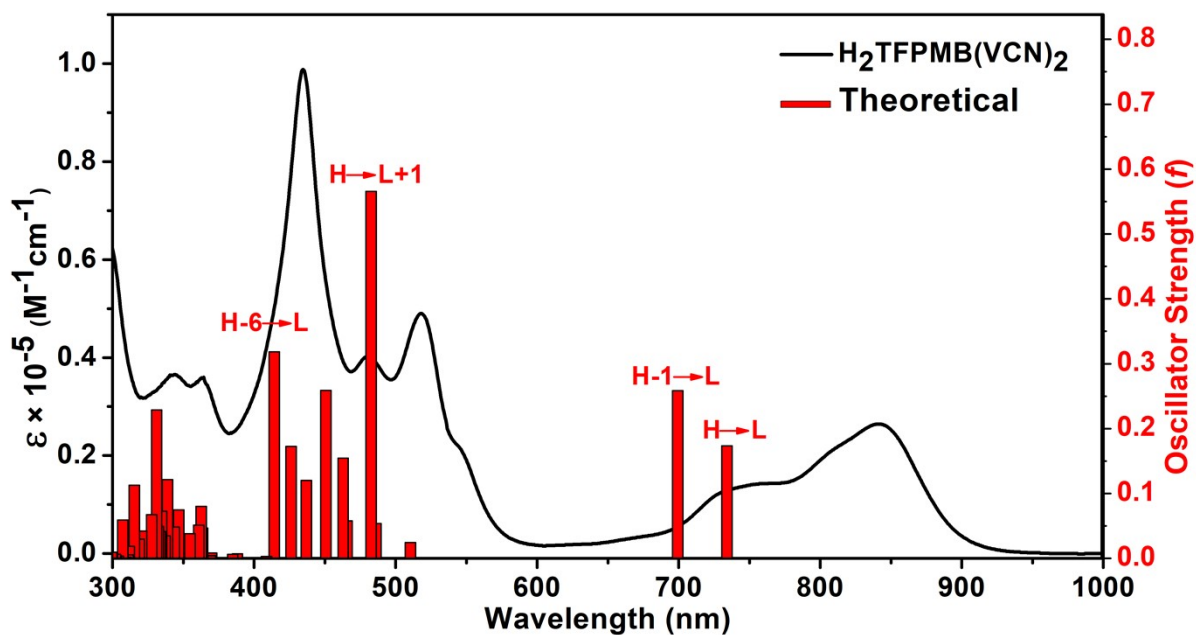

Fig. S41 Comparative (theoretical and experimental) absorption spectra of H<sub>2</sub>TFPMB(VCN)<sub>2</sub>.

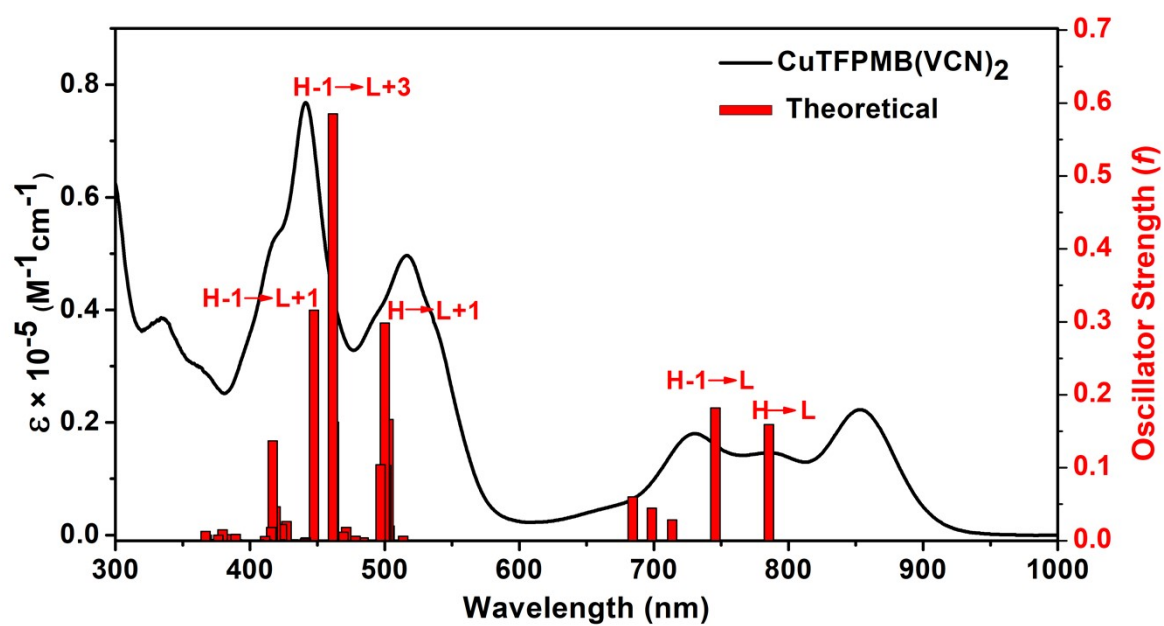

Fig. S42 Comparative (theoretical and experimental) absorption spectra of CuTFPMB(VCN)<sub>2</sub>.

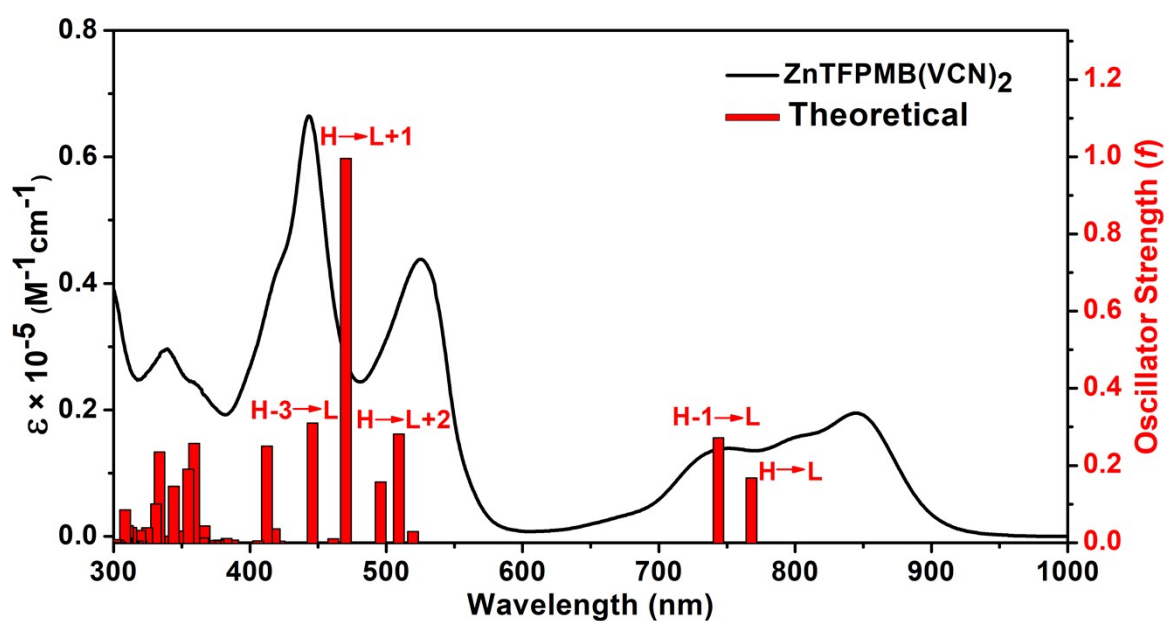

Fig. S43 Comparative (theoretical and experimental) absorption spectra of ZnTFPMB(VCN)<sub>2</sub>.

**Table S7** Calculated electronic excitation energies, major orbital contribution, theoretical and experimental absorption maxima, and oscillatory strength of investigated porphyrins.

| Porphyrinoids                          | Excited state energy (eV) | Contribution  | Coefficient (%) | $\lambda$ (nm) | Oscillatory strength ( <i>f</i> ) | Experimental $\lambda_{\text{max}}$ (nm) in CH <sub>2</sub> Cl <sub>2</sub> |
|----------------------------------------|---------------------------|---------------|-----------------|----------------|-----------------------------------|-----------------------------------------------------------------------------|
| H <sub>2</sub> TPCMB(IND) <sub>2</sub> | 2.8836                    | HOMO→LUMO+3   | 44              | 430            | 1.8419                            |                                                                             |
|                                        | 2.8571                    | HOMO-1→LUMO+3 | 46              | 434            | 1.1174                            | 436                                                                         |
|                                        | 2.1186                    | HOMO→LUMO     | 58              | 585            | 0.0669                            | 674                                                                         |
| H <sub>2</sub> TFPMB(IND) <sub>2</sub> | 2.6872                    | HOMO-1→LUMO+1 | 48              | 461            | 2.017                             | 478                                                                         |
|                                        | 2.0334                    | HOMO→LUMO+1   | 54              | 610            | 0.1587                            | 619                                                                         |
|                                        | 1.8875                    | HOMO→LUMO     | 56              | 657            | 0.096                             | 714                                                                         |
| CuTFPMB(IND) <sub>2</sub>              | 2.6082                    | HOMO-1→LUMO+2 | 44              | 475            | 1.765                             | 480                                                                         |
|                                        | 1.9954                    | HOMO→LUMO     | 59              | 621            | 0.0901                            | 651                                                                         |
| ZnTFPMB(IND) <sub>2</sub>              | 2.6132                    | HOMO→LUMO+4   | 44              | 474            | 1.2390                            | 485                                                                         |
|                                        | 1.9434                    | HOMO→LUMO     | 57              | 638            | 0.1036                            | 661                                                                         |
| H <sub>2</sub> TPCMB(MN) <sub>2</sub>  | 3.0609                    | HOMO-3→LUMO   | 62              | 405            | 0.7326                            | 407                                                                         |
|                                        | 2.8068                    | HOMO→LUMO+1   | 57              | 442            | 1.2945                            | 428                                                                         |
|                                        | 2.1437                    | HOMO-1→LUMO   | 60              | 578            | 0.0742                            | 610                                                                         |
|                                        | 2.1005                    | HOMO→LUMO     | 66              | 590            | 0.2246                            | 666                                                                         |
| H <sub>2</sub> TFPMB(MN) <sub>2</sub>  | 2.6500                    | HOMO-1→LUMO+1 | 63              | 468            | 0.7737                            |                                                                             |
|                                        | 2.6070                    | HOMO-1→LUMO   | 57              | 476            | 2.1071                            | 486                                                                         |
|                                        | 1.9629                    | HOMO→LUMO     | 64              | 632            | 0.1851                            | 730                                                                         |
| CuTFPMB(MN) <sub>2</sub>               | 2.5879                    | HOMO→LUMO+1   | 53              | 479            | 2.0147                            | 481                                                                         |
|                                        | 1.9548                    | HOMO→LUMO     | 59              | 634            | 0.1376                            | 659                                                                         |
| ZnTFPMB(MN) <sub>2</sub>               | 2.6480                    | HOMO-1→LUMO   | 56              | 468            | 2.1938                            | 488                                                                         |
|                                        | 1.9164                    | HOMO→LUMO     | 65              | 647            | 0.1671                            | 674                                                                         |
| H <sub>2</sub> TFPMB(VCN) <sub>2</sub> | 2.9917                    | HOMO-6→LUMO   | 66              | 414            | 0.4366                            | 434                                                                         |
|                                        | 2.5666                    | HOMO→LUMO+1   | 53              | 483            | 0.7759                            | 480                                                                         |
|                                        | 1.7710                    | HOMO-1→LUMO   | 69              | 700            | 0.3546                            | 754                                                                         |
|                                        | 1.6870                    | HOMO→LUMO     | 70              | 735            | 0.2381                            | 840                                                                         |
| CuTFPMB(VCN) <sub>2</sub>              | 2.7712                    | HOMO-1→LUMO+1 | 44              | 447            | 0.3511                            | 441                                                                         |
|                                        | 2.6865                    | HOMO-1→LUMO+3 | 46              | 462            | 0.6502                            |                                                                             |
|                                        | 2.4793                    | HOMO→LUMO+1   | 41              | 500            | 0.3315                            | 517                                                                         |
|                                        | 1.6628                    | HOMO-1→LUMO   | 58              | 746            | 0.2023                            | 730                                                                         |
|                                        | 1.5785                    | HOMO→LUMO     | 68              | 785            | 0.1769                            | 854                                                                         |
| ZnTFPMB(VCN) <sub>2</sub>              | 2.7805                    | HOMO-3→LUMO   | 37              | 446            | 0.3826                            | 444                                                                         |
|                                        | 2.6359                    | HOMO→LUMO+1   | 39              | 470            | 1.2293                            | 444                                                                         |
|                                        | 2.4347                    | HOMO→LUMO+2   | 48              | 509            | 0.3478                            | 525                                                                         |
|                                        | 1.6671                    | HOMO-1→LUMO   | 67              | 744            | 0.3355                            | 748                                                                         |
|                                        | 1.6145                    | HOMO→LUMO     | 68              | 768            | 0.2069                            | 844                                                                         |

## References

- 1 D. Banerjee, S. S. B. Moram, C. Byram, J. Rathod, T. Jena, G. K. Podagatlapalli and V. R. Soma, *Appl. Surf. Sci.*, 2021, **569**, 151070.
- 2 K. S. Srivishnu, D. Banerjee, R. A. Ramnagar, J. Rathod, L. Giribabu and V. R. Soma, *Front. Chem.*, 2021, **9**, 713939.
- 3 A. S. Bulbul, V. Rathour, V. Ganesan and M. Sankar, *Chem. Commun.*, 2024, **60**, 3146–3149.
